# Supplementary material for: Spatial transcriptomics for profiling the tropism of viral vectors in tissues
Source: Nat Biotechnol. 2023 Jan 26;41(9):1272–86. doi: 10.1038/s41587-022-01648-w (PMC10443732; doi:10.1038/s41587-022-01648-w)
Supplement: Supplementary file 4 — All probe sequences [file 41587_2022_1648_MOESM4_ESM.xlsx]

## Sheet: Fig. 1
Figure	Gene	Type	Probe	Sequence (5'->3')	Note
Fig. 1c	Gad1	HCR v3 (B2)	1-1	AgCTCAgTCCATCCTCgT aa TTTCTGGTGCATCCATGGGC	* used for 4 probes
			1-2	CACAGATCTTCAGGCCCAGT aa AAATCCTCATCAATCATC
			2-1	AgCTCAgTCCATCCTCgT aa TCACAGGAAAGCAGGTTCTT
			2-2	GGGCACCCTGGTCACTGTTT aa AAATCCTCATCAATCATC
			3-1	AgCTCAgTCCATCCTCgT aa CAAGAACTGCGCAGTTTGCT
			3-2	AGTATGTCTACCACTTCCAG aa AAATCCTCATCAATCATC
			4-1	AgCTCAgTCCATCCTCgT aa TTAAAGCCTTCCATGCCTTC
			4-2	GGTGGTCAGACAGCTCCAAA aa AAATCCTCATCAATCATC
			5-1	AgCTCAgTCCATCCTCgT aa CCATTCACCAGCTAAACCAA
			5-2	GTATTGGCAGTCGATGTCAG aa AAATCCTCATCAATCATC
			6-1	AgCTCAgTCCATCCTCgT aa AGTGACTGTGTTCTGAGGTG
			6-2	CCCGGCTTTCTTTATGGAAT aa AAATCCTCATCAATCATC
			7-1	AgCTCAgTCCATCCTCgT aa TTCCTTGACCAGAATGGCAG
			7-2	CATCCTTGGAGTATACCCTT aa AAATCCTCATCAATCATC
			8-1	AgCTCAgTCCATCCTCgT aa TGCTTGTCTGGCTGGAAGAG
			8-2	TGTCATAGGAGACGTCATAC aa AAATCCTCATCAATCATC
			9-1	AgCTCAgTCCATCCTCgT aa CTTGAAGATGTCCACATGGC
			9-2	GCTTTCCACATCAGCCAGAA aa AAATCCTCATCAATCATC
			10-1	AgCTCAgTCCATCCTCgT aa TTTCAAATCCCACGGTGCCC
			10-2	CAGGCATTTGTTGATCTGGT aa AAATCCTCATCAATCATC
			11-1	AgCTCAgTCCATCCTCgT aa TCTCGTCGCTCAGGGCTATC
			11-2	GAGCCACCCTGTGTAGCTTT aa AAATCCTCATCAATCATC
			12-1	AgCTCAgTCCATCCTCgT aa GGTTGTTCCTGACTCCATCA
			12-2	TGAGGCTGGTAGCCCACCAT aa AAATCCTCATCAATCATC
			13-1	AgCTCAgTCCATCCTCgT aa GGCTGGGTTAGAGATGACCA
			13-3	TCGATGTCAGACTGGGTGGC aa AAATCCTCATCAATCATC
		RCA (STARmap; Wang et al., 2018, Science)	Gad1_01	/5Phos/ACATTA TCTCTACAGTCAACCAGGATCT AATTATTACTATTTCATACACTA AAGATA
			Gad1_02	/5Phos/ACATTA AGTATCATACGTTGTAGGGC AATTATTACTATTTCATACACTA AAGATA
			Gad1_03	/5Phos/ACATTAGCCATTCACCAGCTAAACCA AATTATTACTATTTCATACACTA AAGATA
			Gad1_04	/5Phos/ACATTAAGCTCCAAATTAAAGCCTTCCATGC AATTATTACTATTTCATACACTA AAGATA
			Gad1_11	CGAACCCCGTACTTCAGGG TAATGTTATCTT
			Gad1_12	CCATGGGCTACGCCACACC TAATGTTATCTT
			Gad1_13	ATATTGGTATTGGCAGTCGATGT TAATGTTATCTT
			Gad1_14	AGAGACTCGGGGTGGTCAG TAATGTTATCTT
			RCA reader	/647N/CATACACTAAAGATAACAT
		RCAHCR	RCAHCR reader (B2)	CATACACTAAAGATAACAT AGCTCAGTCCATCCTCGTAAATCCTCATCAATCATC	* the same RCA probes were used
Fig. 1f	Gapdh (NM_001289726.1)	smHCR	1-1	AgCTCAgTCCATCCTCgTtaACCTGATGAACCTAAGCTGG
			2-1	AgCTCAgTCCATCCTCgTtaCACACCGACCTTCACCATTT
			3-1	AgCTCAgTCCATCCTCgTtaTTGCCACTGCAAATGGCAGC
			4-1	AgCTCAgTCCATCCTCgTtaGTAGTTGAGGTCAATGAAGG
			5-1	AgCTCAgTCCATCCTCgTtaCGTTGAATTTGCCGTGAGTG
			6-1	AgCTCAgTCCATCCTCgTtaACATACTCAGCACCGGCCTC
			7-1	AgCTCAgTCCATCCTCgTtaTATTTCTCGTGGTTCACACC
			8-1	AgCTCAgTCCATCCTCgTtaTCATGGATGACCTTGGCCAG
			9-1	AgCTCAgTCCATCCTCgTtaGGCCATCCACAGTCTTCTGG
			10-1	AgCTCAgTCCATCCTCgTtaGATCCACGACGGACACATTG
			11-1	AgCTCAgTCCATCCTCgTtaACCTGGTCCTCAGTGTAGCC
			12-1	AgCTCAgTCCATCCTCgTtaCCGGCATCGAAGGTGGAAGA
			13-1	AgCTCAgTCCATCCTCgTtaACCAGGAAATGAGCTTGACA
			1-2	GGAAACACTCTCCTGAGTTTatAAATCCTCATCAATCATC
			2-2	CCAATACGGCCAAATCCGTTatAAATCCTCATCAATCATC
			3-2	TGATGGCAACAATCTCCACTatAAATCCTCATCAATCATC
			4-2	TACTGGAACATGTAGACCATatAAATCCTCATCAATCATC
			5-2	ATTCTCGGCCTTGACTGTGCatAAATCCTCATCAATCATC
			6-2	AGACACCAGTAGACTCCACGatAAATCCTCATCAATCATC
			7-2	CAATCTTGAGTGAGTTGTCAatAAATCCTCATCAATCATC
			8-2	CTTCCACAATGCCAAAGTTGatAAATCCTCATCAATCATC
			9-2	ACGCCACAGCTTTCCAGAGGatAAATCCTCATCAATCATC
			10-2	TTTCTCCAGGCGGCACGTCAatAAATCCTCATCAATCATC
			11-2	TGTTGAAGTCGCAGGAGACAatAAATCCTCATCAATCATC
			12-2	CATTGAGAGCAATGCCAGCCatAAATCCTCATCAATCATC
			13-2	GTAGCCGTATTCATTGTCATatAAATCCTCATCAATCATC
		RCAHCR	Gapdh_prm	CAATCTTGAGTGAGTTGTCATAATGTTATCTT
			Gapdh_pdl	/5Phos/ACATTATATTTCTCGTGGTTCACACCatttaTATTATTATATTTACCCTAattaAAGATA
	Eef2 (NM_007907.2)	smHCR	1-1	AgCTCAgTCCATCCTCgTtaATCTACTGTGAAGTTCACCA
			2-1	AgCTCAgTCCATCCTCgTtaGCGATGACTGACATGTTCCG
			3-1	AgCTCAgTCCATCCTCgTtaTGTCAGTGAAGCGCGTCTCC
			4-1	AgCTCAgTCCATCCTCgTtaGAGATGGCGGTGGATTTGAT
			5-1	AgCTCAgTCCATCCTCgTtaCGAGCCATCCTTGCTCTGCT
			6-1	AgCTCAgTCCATCCTCgTtaAGAAGTCCACATGGCCTGGA
			7-1	AgCTCAgTCCATCCTCgTtaACCAGAGCTCCATCGGTGAC
			8-1	AgCTCAgTCCATCCTCgTtaGCGCAGCACAGTTTCTGTCT
			9-1	AgCTCAgTCCATCCTCgTtaAGGTCTGGTAGAGCTCCTCG
			10-1	AgCTCAgTCCATCCTCgTtaTCTCCGCAAACTGCTTCAGG
			11-1	AgCTCAgTCCATCCTCgTtaTTTCTTGGCACGCTCGGCTG
			12-1	AgCTCAgTCCATCCTCgTtaGGATCAAAGTACCGGTCTCC
			13-1	AgCTCAgTCCATCCTCgTtaGTCGAACACCTTGAAGATGG
			14-1	AgCTCAgTCCATCCTCgTtaTCTCGATCAGCTTGGCTGTC
			15-1	AgCTCAgTCCATCCTCgTtaGTACTTCTGTGCAGTGACGG
			16-1	AgCTCAgTCCATCCTCgTtaCCATCTTGGAAATGTACATC
			17-1	AgCTCAgTCCATCCTCgTtaGTATAGGTCCTCTTTCTTCC
			18-1	AgCTCAgTCCATCCTCgTtaTCAATCGGCTCCACGTAGCG
			19-1	AgCTCAgTCCATCCTCgTtaCCGTCTTCACAAGGAACTGG
			20-1	AgCTCAgTCCATCCTCgTtaGTCAGACTTAGCCAGCCGCT
			21-1	AgCTCAgTCCATCCTCgTtaGGCGCCAGCAATAATATGTT
			22-1	AgCTCAgTCCATCCTCgTtaATTCCTCACTGACTGTCTCC
			23-1	AgCTCAgTCCATCCTCgTtaCTTGGTGATGTCGGTGAGAA
			24-1	AgCTCAgTCCATCCTCgTtaACCGCACACCACGCATGTTT
			25-1	AgCTCAgTCCATCCTCgTtaAGATAGGCTCCATGAGGCGG
			26-1	AgCTCAgTCCATCCTCgTtaAGGACACCGTAGATGCCACC
			27-1	AgCTCAgTCCATCCTCgTtaTGCCTTGACCACAAACATGG
			1-2	TCCATGATGGCACGGATCTGatAAATCCTCATCAATCATC
			2-2	ACTTGCCGTGGTCCACATGGatAAATCCTCATCAATCATC
			3-2	CTCCTGCTCATCCTTGCGAGatAAATCCTCATCAATCATC
			4-2	CAGAGAGCTCGTAGAAGAGGatAAATCCTCATCAATCATC
			5-2	ATGAGGTTGATGAGGAAGCCatAAATCCTCATCAATCATC
			6-2	GGCAGCTGTCACCTCTGAAGatAAATCCTCATCAATCATC
			7-2	CAGACACACAGTCCACCACCatAAATCCTCATCAATCATC
			8-2	ATGCGTTCAGCGATGGCCTGatAAATCCTCATCAATCATC
			9-2	GTTCTCCACGATGCGCTGGAatAAATCCTCATCAATCATC
			10-2	TGCAAACTTGGCCACATACAatAAATCCTCATCAATCATC
			11-2	TTCTTCATCATGTCCTCTACatAAATCCTCATCAATCATC
			12-2	TACTGAACTTGCCATTGGCCatAAATCCTCATCAATCATC
			13-2	TTCCTGAAGTTCATGATGGCatAAATCCTCATCAATCATC
			14-2	GTCCAGCTTGATGTCCAGCTatAAATCCTCATCAATCATC
			15-2	TCGTATAGCAGCTCACAACGatAAATCCTCATCAATCATC
			16-2	GCCTTTGTCAGAGGTTGGCAatAAATCCTCATCAATCATC
			17-2	GTTCTCTGGATAGGCTTCAGatAAATCCTCATCAATCATC
			18-2	TGTTTCCACATGGCACGTCCatAAATCCTCATCAATCATC
			19-2	CTCAAAGGTAGTGATGGTCCatAAATCCTCATCAATCATC
			20-2	ATGATGCACTGCACCATAGGatAAATCCTCATCAATCATC
			21-2	ATCTCCAGGTGCAGCTCACCatAAATCCTCATCAATCATC
			22-2	GGACAGACACAGCACGTTGGatAAATCCTCATCAATCATC
			23-2	TCATTCAGGTACTGCACACCatAAATCCTCATCAATCATC
			24-2	GGTCACATCATGAACATCAAatAAATCCTCATCAATCATC
			25-2	ACACTGGATCTCCACCAGATatAAATCCTCATCAATCATC
			26-2	CATGGCCACGCTTCCTGTTCatAAATCCTCATCAATCATC
			27-2	GACTCATTGACAGGCAGGTAatAAATCCTCATCAATCATC
		RCAHCR	Eef2_prm	TGGCTTTCTTGTCCATGATGTAATGTTATCTT
			Eef2_pdl	/5Phos/ACATTAGCACGGATCTGATCTACTGTatttaTATTATTATATTTACCCTAattaAAGATA
	Tfrc (NM_011638.4)	smHCR	1-1	AgCTCAgTCCATCCTCgTtaTGATCTGGCTTGATCCATCA
			2-1	AgCTCAgTCCATCCTCgTtaTGCCGAGCAAGGCTAAACCG
			3-1	AgCTCAgTCCATCCTCgTtaTTTCTTCTTCATCTGCAGCC
			4-1	AgCTCAgTCCATCCTCgTtaTCTTCCATTAAACCTCTTGG
			5-1	AgCTCAgTCCATCCTCgTtaCAGGTAGCCACTCATGAATC
			6-1	AgCTCAgTCCATCCTCgTtaCCAGTTTCACACACTCCTCT
			7-1	AgCTCAgTCCATCCTCgTtaTCCTCTGTTTCCATGGTTTC
			8-1	AgCTCAgTCCATCCTCgTtaCTTCTCTGACAACAGTGTTT
			9-1	AgCTCAgTCCATCCTCgTtaTCTGGCTCAGCTGCTTGATG
			10-1	AgCTCAgTCCATCCTCgTtaGCCAGACTTTGCTGAATTTA
			11-1	AgCTCAgTCCATCCTCgTtaTGCACTATGGTCACCATGTT
			12-1	AgCTCAgTCCATCCTCgTtaTTACTGAATGCCACATAACC
			13-1	AgCTCAgTCCATCCTCgTtaAAGGTCTGCCTCAACAACGG
			14-1	AgCTCAgTCCATCCTCgTtaGTGTGTATGGATCACCAGTT
			15-1	AgCTCAgTCCATCCTCgTtaCTGATGACTGAGATGGCGGA
			16-1	AgCTCAgTCCATCCTCgTtaAGGACAGCTTCCTTCCATTT
			17-1	AgCTCAgTCCATCCTCgTtaCTGGTTCCTCATAACCTTTA
			18-1	AgCTCAgTCCATCCTCgTtaCACACTGGACTTCGCCGCAA
			19-1	AgCTCAgTCCATCCTCgTtaGGCAAAGATTATACTTCTGC
			20-1	AgCTCAgTCCATCCTCgTtaCTCCAACCACTCAGTGGCAC
			21-1	AgCTCAgTCCATCCTCgTtaACTAGTACCAAGGACAACTT
			22-1	AgCTCAgTCCATCCTCgTtaGGAAAGTTTCTCAACTTTGC
			23-1	AgCTCAgTCCATCCTCgTtaCCAAATAAGGATAGTCTGCA
			24-1	AgCTCAgTCCATCCTCgTtaTGAGGAACTTTCTGAGTCAA
			25-1	AgCTCAgTCCATCCTCgTtaAGCCACTGTAGACTTAGACC
			26-1	AgCTCAgTCCATCCTCgTtaGCGACAGGAAGTGATACTCC
			27-1	AgCTCAgTCCATCCTCgTtaAGAGTGTGAGAGCCAGAGCC
			28-1	AgCTCAgTCCATCCTCgTtaGCCAACTGGTTTCTGAAGAG
			1-2	CCAAACAAGTTAGAGAATGCatAAATCCTCATCAATCATC
			2-2	GACTGTTATCTCCATCTACTatAAATCCTCATCAATCATC
			3-2	CTTCATGTTATTGTCGGCATatAAATCCTCATCAATCATC
			4-2	GCAATAGCTGCAAAGCAGAGatAAATCCTCATCAATCATC
			5-2	TCTACACGCTTACAATAGCCatAAATCCTCATCAATCATC
			6-2	GTCTGTCTCCTCCGTTTCAGatAAATCCTCATCAATCATC
			7-2	AGCGAGATGATGTAGGAACAatAAATCCTCATCAATCATC
			8-2	GCAAACTCTATGGAGTTCAAatAAATCCTCATCAATCATC
			9-2	CTCACGAGGAGTGTATGTATatAAATCCTCATCAATCATC
			10-2	CTTCACATAGTGTTCATCTCatAAATCCTCATCAATCATC
			11-2	GGTCTAAGTTACCATTTGACatAAATCCTCATCAATCATC
			12-2	TACCAGAAACTTCTGTAGGTatAAATCCTCATCAATCATC
			13-2	TGAGCATGTCCAAAGAGTGCatAAATCCTCATCAATCATC
			14-2	ATTGAAAGAAGGAAAGCCAGatAAATCCTCATCAATCATC
			15-2	CACAGGTATATTAGGCAACCatAAATCCTCATCAATCATC
			16-2	GAATCTATGTTCCATCTAGCatAAATCCTCATCAATCATC
			17-2	TCCTACTACAACATAACGGTatAAATCCTCATCAATCATC
			18-2	TTCAACAGAAGACCTGTTCCatAAATCCTCATCAATCATC
			19-2	AAGTCGCCTGCAGTCCAGCTatAAATCCTCATCAATCATC
			20-2	TGCAAAGATGAAAGGTATCCatAAATCCTCATCAATCATC
			21-2	CTGGCAGAAACTTTGAAGTTatAAATCCTCATCAATCATC
			22-2	GGATATGCAGCATTGTCAAAatAAATCCTCATCAATCATC
			23-2	ATAGGTATCCAATCTAGTGCatAAATCCTCATCAATCATC
			24-2	TACGAACCATTTGGTTGAGCatAAATCCTCATCAATCATC
			25-2	AGTCTCCACGAGCGGAATACatAAATCCTCATCAATCATC
			26-2	CTCTCTTGGAGATACATAGGatAAATCCTCATCAATCATC
			27-2	AGTTCTCCACTAAAGCTGAGatAAATCCTCATCAATCATC
			28-2	GAATAGTCCAAGTAGCCAGGatAAATCCTCATCAATCATC
		RCAHCR	Tfrc_prm	TCTACACGCTTACAATAGCCTAATGTTATCTT
			Tfrc_pdl	/5Phos/ACATTACAGGTAGCCACTCATGAATCatttaTATTATTATATTTACCCTAattaAAGATA
	Polr2a (NM_001291068.1)	smHCR	1-1	AgCTCAgTCCATCCTCgTtaTCTCTTGATGGTGCGCAGCG
			2-1	AgCTCAgTCCATCCTCgTtaATGTTTGGCAGCGGCCAGTC
			3-1	AgCTCAgTCCATCCTCgTtaTCGATGTGGCCAAAGTGGCC
			4-1	AgCTCAgTCCATCCTCgTtaACCTTCATTGTCTTCACCAG
			5-1	AgCTCAgTCCATCCTCgTtaCCTTAGATTTGGCCAGGATG
			6-1	AgCTCAgTCCATCCTCgTtaCTCCACCTTCACAGATGTTT
			7-1	AgCTCAgTCCATCCTCgTtaACAACTCTAGGCCAGAGCGC
			8-1	AgCTCAgTCCATCCTCgTtaCTGGACTCAGCAAGATCTTT
			9-1	AgCTCAgTCCATCCTCgTtaCAATCATCCACTCAGGCCGG
			10-1	AgCTCAgTCCATCCTCgTtaCTGCATCACCACAGCAGGTC
			11-1	AgCTCAgTCCATCCTCgTtaATGTCAGCCAGTTTGTGAGT
			12-1	AgCTCAgTCCATCCTCgTtaGCAGCTGCACCATTCTGCTC
			13-1	AgCTCAgTCCATCCTCgTtaGGCCACATGGAACTGGAGAA
			14-1	AgCTCAgTCCATCCTCgTtaTGTTGGCAGCAATGGAGCGG
			15-1	AgCTCAgTCCATCCTCgTtaCCTGCGTACTAATTCCTGAA
			16-1	AgCTCAgTCCATCCTCgTtaCATTATCGCGGATGATGTAC
			17-1	AgCTCAgTCCATCCTCgTtaCTGCAGATGAAGGTCACTGG
			18-1	AgCTCAgTCCATCCTCgTtaCACACTAAGATTCAACCGAA
			19-1	AgCTCAgTCCATCCTCgTtaGCAAATTCATCTCATCTCCA
			20-1	AgCTCAgTCCATCCTCgTtaGCCAACTCTTGGATCTCTGC
			21-1	AgCTCAgTCCATCCTCgTtaCATGACAGGTCGATTGCTCT
			22-1	AgCTCAgTCCATCCTCgTtaCCGCTCCAGGAAGACATCTC
			23-1	AgCTCAgTCCATCCTCgTtaGAGAAGATCTGCTTGCCTGT
			24-1	AgCTCAgTCCATCCTCgTtaGCCACTATCTTCATCATCAG
			25-1	AgCTCAgTCCATCCTCgTtaAATGTTGGAGTAGAAGAGGC
			26-1	AgCTCAgTCCATCCTCgTtaCCAATGCCAATGGTATGACC
			27-1	AgCTCAgTCCATCCTCgTtaAGCCTTCTCAATGACCTCTA
			28-1	AgCTCAgTCCATCCTCgTtaTGTCTCGAGCATCATTGAGA
			1-2	CTCAGGACTCCGAACTGCACatAAATCCTCATCAATCATC
			2-2	CTCGGTCATGTTTCCTGCACatAAATCCTCATCAATCATC
			3-2	GAAACACAGGTTTGGCCAATatAAATCCTCATCAATCATC
			4-2	AGAAGCAGACACAGCGCAAAatAAATCCTCATCAATCATC
			5-2	AAGCCGTTTCTTTGGCTGCCatAAATCCTCATCAATCATC
			6-2	AAACTTGTTGTCCATCTCCTatAAATCCTCATCAATCATC
			7-2	AACATGCTTCCATTCAGCATatAAATCCTCATCAATCATC
			8-2	GAAGATTTCATGCACTCGTTatAAATCCTCATCAATCATC
			9-2	AGGCACAGGCAACACTGTGAatAAATCCTCATCAATCATC
			10-2	TCCTGGTTTCGAGCAGAACCatAAATCCTCATCAATCATC
			11-2	GCTGATTGTTGATCTTCACAatAAATCCTCATCAATCATC
			12-2	CATCTTCTGCTATGACATGGatAAATCCTCATCAATCATC
			13-2	AGTTCATTGTCCACCATGGTatAAATCCTCATCAATCATC
			14-2	GACAATCTCTGCAAAGGTCAatAAATCCTCATCAATCATC
			15-2	CCTGGATACTGGCTGTTTCCatAAATCCTCATCAATCATC
			16-2	ACGCAAGTCAATTCGATCGCatAAATCCTCATCAATCATC
			17-2	CGTTCCACCTTATAGCCAGTatAAATCCTCATCAATCATC
			18-2	TCTGCATTGTATGGAGTTGTatAAATCCTCATCAATCATC
			19-2	TTCCAGAGACTGTGGCAGATatAAATCCTCATCAATCATC
			20-2	CAATCATTCGAGGCACCATAatAAATCCTCATCAATCATC
			21-2	AGTGTGTCTTGCACAATACCatAAATCCTCATCAATCATC
			22-2	AAGAGGTTCATGACTTCACCatAAATCCTCATCAATCATC
			23-2	TGTGTCCAGGTATGATGAGGatAAATCCTCATCAATCATC
			24-2	GGAGAGATGTGCTTGTAAGGatAAATCCTCATCAATCATC
			25-2	CAGTTGTTAATGACAGTCTGatAAATCCTCATCAATCATC
			26-2	TTGAATCTGCAATGGAGTCCatAAATCCTCATCAATCATC
			27-2	GGTTCTAGCTCATTGTTATGatAAATCCTCATCAATCATC
			28-2	CTGTGCAGAGGAGCCAGTTTatAAATCCTCATCAATCATC
		RCAHCR	Polr2a_prm	AAGCCGTTTCTTTGGCTGCCTAATGTTATCTT
			Polr2a_pdl	/5Phos/ACATTACCTTAGATTTGGCCAGGATGatttaTATTATTATATTTACCCTAattaAAGATA
			RCAHCR reader (B2)	TATTATTATATTTACCCTA AGCTCAGTCCATCCTCGTAAATCCTCATCAATCATC	* the same RCAHCR reader was used for all
Fig. 1i	Pvalb (NM_013645.4)	RCAHCR	Pvalb_ugi39_prm_1	TTCTTGATGTCCTCAGCGCTTAATGTTATCTT
			Pvalb_ugi39_pdl_1	/5Phos/ACATTAGAGCACGTCTGTCATCGACAatttaTATACTTCATATATAATAAattaAAGATA
			Pvalb_ugi39_prm_2	TTGTGGTCGAAGGAGTCTGCTAATGTTATCTT
			Pvalb_ugi39_pdl_2	/5Phos/ACATTAAGCAGCAAAGGCTCCTATCGatttaTATACTTCATATATAATAAattaAAGATA
			Pvalb_ugi39_prm_3	CTTTGTCCAGAATATGGAACTAATGTTATCTT
			Pvalb_ugi39_pdl_3	/5Phos/ACATTAACCTTCTTCACCTCATCCGGatttaTATACTTCATATATAATAAattaAAGATA
			Pvalb_ugi39_prm_4	GTTTCTTTAGCAGACAAGTCTAATGTTATCTT
			Pvalb_ugi39_pdl_4	/5Phos/ACATTATCTGGCATCTGAGGAGAAGCatttaTATACTTCATATATAATAAattaAAGATA
	Sst (NM_009215.1)	RCAHCR	Sst_ugi40_prm_1	GCAGCCGCCAGAGACTTCTGTAATGTTATCTT
			Sst_ugi40_pdl_1	/5Phos/ACATTACAGAAACTGACGGAGTCTGGatttaTATAATATTACTTATCTCTattaAAGATA
			Sst_ugi40_prm_2	AGCAGCTCTGCCAAGAAGTATAATGTTATCTT
			Sst_ugi40_pdl_2	/5Phos/ACATTACTTGGCCAGTTCCTGTTTCCatttaTATAATATTACTTATCTCTattaAAGATA
			Sst_ugi40_prm_3	TCTGCAGCTCCAGCCTCATCTAATGTTATCTT
			Sst_ugi40_pdl_3	/5Phos/ACATTATCGTCCTGCTCAGCTGCCTGatttaTATAATATTACTTATCTCTattaAAGATA
			Sst_ugi40_prm_4	TGTCTTCCAGAAGAAGTTCTTAATGTTATCTT
			Sst_ugi40_pdl_4	/5Phos/ACATTATGCAGCCAGCTTTGCGTTCCatttaTATAATATTACTTATCTCTattaAAGATA
	Vip (NM_011702.3)	RCAHCR	Vip_ugi41_prm_1	ATCAGGAATGCCAGGAACTGTAATGTTATCTT
			Vip_ugi41_pdl_1	/5Phos/ACATTAAGGCTTGCTTCTGGCTTCCAatttaATTCTATTAACCTATATATattaAAGATA
			Vip_ugi41_prm_2	TCCAAAGAGAGGCCAGGCCATAATGTTATCTT
			Vip_ugi41_pdl_2	/5Phos/ACATTAGCGACTGAGAGAACAGCACAatttaATTCTATTAACCTATATATattaAAGATA
			Vip_ugi41_prm_3	AAACGGCATCCTGTCATCCATAATGTTATCTT
			Vip_ugi41_pdl_3	/5Phos/ACATTAGCCTACTCACTACAGAAGGTatttaATTCTATTAACCTATATATattaAAGATA
			Vip_ugi41_prm_4	GCAAGATGTCAGAGTCTGCTTAATGTTATCTT
			Vip_ugi41_pdl_4	/5Phos/ACATTATTTAAAGAGACTTGGTCAGGatttaATTCTATTAACCTATATATattaAAGATA
		RCAHCR readers	ugi39 R B2I2	TATACTTCATATATAATAA AGCTCAGTCCATCCTCGTAAATCCTCATCAATCATC
			ugi40 R B3I2	TATAATATTACTTATCTCT AAAgTCTAATCCgTCCCTgCCTCTATATCTCCACTC
			ugi41 R B5I2	ATTCTATTAACCTATATAT CACTTCATATCACTCACTCCCAATCTCTATCTACCC

## Sheet: Fig. 2
Figure	Gene	Probe	Sequence (5'->3')	Note
Fig. 2b	AAV9 VP3	vp3_primer_1	tattgtctgccactggcgcgta TAATGTTATCTT
		vp3_primer_2	tgccaatttcccgaggaactta TAATGTTATCTT
		vp3_primer_3	tcgaagatcctccagatgtgta TAATGTTATCTT
		vp3_primer_4	ggtgagaagtggcagtggaata TAATGTTATCTT
		vp3_padlock_1	/5Phos/ACATTA atcactccatcggcaccttcgt AATTATTACTATTTCATACACTAAAGATA
		vp3_padlock_2	/5Phos/ACATTA atccagccattgggaatcgcaa AATTATTACTATTTCATACACTAAAGATA
		vp3_padlock_3	/5Phos/ACATTA atgccgaagtaggcgttgtcat AATTATTACTATTTCATACACTAAAGATA
		vp3_padlock_4	/5Phos/ACATTA attgagtcgctgccagtcacgt AATTATTACTATTTCATACACTAAAGATA
	AAV-PHP.eB	eB_padlock	/5Phos/ACATTA ctgtgccttaaaaggcaccg AATTATTACTATTTCATACACTAAAGATA
	AAV-PHP.S	S_padlock	/5Phos/ACATTA ctgtgccaaagacgtcctaa AATTATTACTATTTCATACACTAAAGATA
		primer	tgaacccaAccggtctgcgc TAATGTTATCTT
	reader	19nt-B2I2	CATACACTAAAGATAACAT AGCTCAGTCCATCCTCGTAAATCCTCATCAATCATC
Fig. 2d	Barcode	BC1-ugi1_primer-1	CAACTACCTATACCTCCCAT TAATGTTATCTT
		BC1-ugi1_padlock-1	/5Phos/ACATTA CCATACCTTACCACCTATCT ATTTA TATTATTATATTTACCCTA ATTA AAGATA
		BC1-ugi1_primer-2	CCACTCAACTAAACCTACCT TAATGTTATCTT
		BC1-ugi1_padlock-2	/5Phos/ACATTA TCCCAACTAACCTACCATTC ATTTA TATTATTATATTTACCCTA ATTA AAGATA
		BC1-ugi1_primer-3	ACCCAATCCACCTATATTCC TAATGTTATCTT
		BC1-ugi1_padlock-3	/5Phos/ACATTA TACCTTACAACTATCCCTCC ATTTA TATTATTATATTTACCCTA ATTA AAGATA
		BC1-ugi1_primer-4	CCTAACCCTACTAATTCTCC TAATGTTATCTT
		BC1-ugi1_padlock-4	/5Phos/ACATTA TTCCTAACATACCCTCAACC ATTTA TATTATTATATTTACCCTA ATTA AAGATA
	reader	ugi1 R B2I2	TATTATTATATTTACCCTA AGCTCAGTCCATCCTCGTAAATCCTCATCAATCATC

## Sheet: Fig. 3
	Gene	Probe name	Sequence (5'->3')
AAV	AAV-PHP.eB (BC1)	BC1-ugi1_primer-1	CAACTACCTATACCTCCCAT TAATGTTATCTT
		BC1-ugi1_padlock-1	/5Phos/ACATTA CCATACCTTACCACCTATCT ATTTA TATTATTATATTTACCCTA ATTA AAGATA
		BC1-ugi1_primer-2	CCACTCAACTAAACCTACCT TAATGTTATCTT
		BC1-ugi1_padlock-2	/5Phos/ACATTA TCCCAACTAACCTACCATTC ATTTA TATTATTATATTTACCCTA ATTA AAGATA
		BC1-ugi1_primer-3	ACCCAATCCACCTATATTCC TAATGTTATCTT
		BC1-ugi1_padlock-3	/5Phos/ACATTA TACCTTACAACTATCCCTCC ATTTA TATTATTATATTTACCCTA ATTA AAGATA
		BC1-ugi1_primer-4	CCTAACCCTACTAATTCTCC TAATGTTATCTT
		BC1-ugi1_padlock-4	/5Phos/ACATTA TTCCTAACATACCCTCAACC ATTTA TATTATTATATTTACCCTA ATTA AAGATA
	AAV.CAP-B10 (BC9)	BC9-ugi9_primer-1	ACTCACCCTAATCTCCCTAC TAATGTTATCTT
		BC9-ugi9_padlock-1	/5Phos/ACATTA CCCTTAACACCCTACCATAA ATTTA TATATTCATTAACAATTAA ATTA AAGATA
		BC9-ugi9_primer-2	ACCTCTCCTCTCTCCTCTCA TAATGTTATCTT
		BC9-ugi9_padlock-2	/5Phos/ACATTA CTACCTACTCATAACCCTCT ATTTA TATATTCATTAACAATTAA ATTA AAGATA
		BC9-ugi9_primer-3	CACTACTATCCCTACATCAC TAATGTTATCTT
		BC9-ugi9_padlock-3	/5Phos/ACATTA CCCACAATACTCCCTAATCC ATTTA TATATTCATTAACAATTAA ATTA AAGATA
		BC9-ugi9_primer-4	CACCACACCACACACACCAA TAATGTTATCTT
		BC9-ugi9_padlock-4	/5Phos/ACATTA CTCCCTAACCTATCCTCCTA ATTTA TATATTCATTAACAATTAA ATTA AAGATA
	AAV-PHP.N (BC16)	BC16-ugi16_primer-1	CCAAACCTAACCATAATCCC TAATGTTATCTT
		BC16-ugi16_padlock-1	/5Phos/ACATTA TACCCTTACACCCAATCCCT ATTTA TATAACACTATTTATCTAT ATTA AAGATA
		BC16-ugi16_primer-2	ACCCTCTATACAACCCTTCC TAATGTTATCTT
		BC16-ugi16_padlock-2	/5Phos/ACATTA CACCATAACCCTAACCACCC ATTTA TATAACACTATTTATCTAT ATTA AAGATA
		BC16-ugi16_primer-3	TATCCCACCTAAATCCCACA TAATGTTATCTT
		BC16-ugi16_padlock-3	/5Phos/ACATTA CCACCCTATACTCATTACCC ATTTA TATAACACTATTTATCTAT ATTA AAGATA
		BC16-ugi16_primer-4	TCCTTACTACCCATCTATCC TAATGTTATCTT
		BC16-ugi16_padlock-4	/5Phos/ACATTA CCTCCATACCTACTTACCCT ATTTA TATAACACTATTTATCTAT ATTA AAGATA
	AAV-PHP.AX (BC23)	BC23-ugi23_primer-1	CCACATCCTATCCTACTCAC TAATGTTATCTT
		BC23-ugi23_padlock-1	/5Phos/ACATTA ACACTCCTACTAAACCATCC ATTTA ACTACTATTTATATATCTA ATTA AAGATA
		BC23-ugi23_primer-2	CCACCCTATACCCTCTAAAT TAATGTTATCTT
		BC23-ugi23_padlock-2	/5Phos/ACATTA CACTCAACCTATTCACTCCC ATTTA ACTACTATTTATATATCTA ATTA AAGATA
		BC23-ugi23_primer-3	ACCCACCTAATCTCACTTAC TAATGTTATCTT
		BC23-ugi23_padlock-3	/5Phos/ACATTA CTCTCAACCTATCTACCCTC ATTTA ACTACTATTTATATATCTA ATTA AAGATA
		BC23-ugi23_primer-4	TCACAACCCTATACAACACC TAATGTTATCTT
		BC23-ugi23_padlock-4	/5Phos/ACATTA CCTCTTATCCTATCCACTAC ATTTA ACTACTATTTATATATCTA ATTA AAGATA
	AAV-PHP.B8 (BC25)	BC25-ugi25_primer-1	CCATAATCAATCCTACTCCC TAATGTTATCTT
		BC25-ugi25_padlock-1	/5Phos/ACATTA CTATCCTACCATACCTTACC ATTTA ACTCTAACTAAATAATAAT ATTA AAGATA
		BC25-ugi25_primer-2	CACCCACTAACCCTCATATT TAATGTTATCTT
		BC25-ugi25_padlock-2	/5Phos/ACATTA CCCACCTATCAATCCCTTAT ATTTA ACTCTAACTAAATAATAAT ATTA AAGATA
		BC25-ugi25_primer-3	CCCTAACCATATACCCTACC TAATGTTATCTT
		BC25-ugi25_padlock-3	/5Phos/ACATTA CTCAACCTATCCTTACTACC ATTTA ACTCTAACTAAATAATAAT ATTA AAGATA
		BC25-ugi25_primer-4	CCCTACTCACTAATCAACCA TAATGTTATCTT
		BC25-ugi25_padlock-4	/5Phos/ACATTA CCACCTAACTATCTTACCTC ATTTA ACTCTAACTAAATAATAAT ATTA AAGATA
	AAV-PHP.V1 (BC27)	BC27-ugi27_primer-1	CCCATACTACCTTATCACCC TAATGTTATCTT
		BC27-ugi27_padlock-1	/5Phos/ACATTA CCTCCACTAAACCTATACCT ATTTA AAACTATATAATTATCTTA ATTA AAGATA
		BC27-ugi27_primer-2	CCCTACACTTAATACCACCC TAATGTTATCTT
		BC27-ugi27_padlock-2	/5Phos/ACATTA CCCTTACCAATCTAACCCTC ATTTA AAACTATATAATTATCTTA ATTA AAGATA
		BC27-ugi27_primer-3	CTACTCCAATAATACCCTCC TAATGTTATCTT
		BC27-ugi27_padlock-3	/5Phos/ACATTA CTAATCCTACAACCTATCCC ATTTA AAACTATATAATTATCTTA ATTA AAGATA
		BC27-ugi27_primer-4	CCACATTACCCTTAACTCCC TAATGTTATCTT
		BC27-ugi27_padlock-4	/5Phos/ACATTA ACACTCCCTATCTAACCACC ATTTA AAACTATATAATTATCTTA ATTA AAGATA
Endogenous genes	Slc17a7 (NM_182993.2)	Slc17a7_ugi31_prm_1	GCGATGATGTAGCGACGAGGTAATGTTATCTT
		Slc17a7_ugi31_pdl_1	/5Phos/ACATTAGAGGCCAAAGCAGGTGCAGTatttaACTACAATACTAATTAATTattaAAGATA
		Slc17a7_ugi31_prm_2	GGCAGATAAATCCTCCAGGATAATGTTATCTT
		Slc17a7_ugi31_pdl_2	/5Phos/ACATTAATCTGAGTGACAATGTAGCCatttaACTACAATACTAATTAATTattaAAGATA
		Slc17a7_ugi31_prm_3	AAGGATCCTCACGAAGATGATAATGTTATCTT
		Slc17a7_ugi31_pdl_3	/5Phos/ACATTACACAGCCATAGTGAACGCGGatttaACTACAATACTAATTAATTattaAAGATA
		Slc17a7_ugi31_prm_4	ATAGAAGACAGAACTCCATCTAATGTTATCTT
		Slc17a7_ugi31_pdl_4	/5Phos/ACATTACTGAATACTGCACAAGGACCatttaACTACAATACTAATTAATTattaAAGATA
	Gad1 (NM_008077.5)	Gad1_ugi32_prm_1	CAAGTATCATACGTTGTAGGTAATGTTATCTT
		Gad1_ugi32_pdl_1	/5Phos/ACATTAGCGCAGGTTGGTAGTATTAGatttaTATCTAAACTTAATATTCTattaAAGATA
		Gad1_ugi32_prm_2	TCTTGGAGGACTGCCTCTCCTAATGTTATCTT
		Gad1_ugi32_pdl_2	/5Phos/ACATTACTGAAGGCGCTCACAAGACGatttaTATCTAAACTTAATATTCTattaAAGATA
		Gad1_ugi32_prm_3	GTCTACCACTTCCAGCAAGATAATGTTATCTT
		Gad1_ugi32_pdl_3	/5Phos/ACATTAACTGCGCAGTTTGCTCCTCCatttaTATCTAAACTTAATATTCTattaAAGATA
		Gad1_ugi32_prm_4	GATCTGCTCCAGAGACTCGGTAATGTTATCTT
		Gad1_ugi32_pdl_4	/5Phos/ACATTAGGTGGTCAGACAGCTCCAAAatttaTATCTAAACTTAATATTCTattaAAGATA
	Gja1 (NM_010288.3)	Gja1_ugi33_prm_1	CCAGGAGCAGGATTCTGAAATAATGTTATCTT
		Gja1_ugi33_pdl_1	/5Phos/ACATTAATGAAGAGCACCGACAGCCAatttaTAATCAAATTTACATATATattaAAGATA
		Gja1_ugi33_prm_2	GAAGCGCACGTGAGAGATGGTAATGTTATCTT
		Gja1_ugi33_pdl_2	/5Phos/ACATTAGGAAGGACTTGTCATAGCAGatttaTAATCAAATTTACATATATattaAAGATA
		Gja1_ugi33_prm_3	AGGCCACCTCTCATCTTCACTAATGTTATCTT
		Gja1_ugi33_pdl_3	/5Phos/ACATTACTTGCCGTGTTCTTCAATCCatttaTAATCAAATTTACATATATattaAAGATA
		Gja1_ugi33_prm_4	AGACCGCACTCAGGCTGAACTAATGTTATCTT
		Gja1_ugi33_pdl_4	/5Phos/ACATTACCATAGATGTACCACTGGATatttaTAATCAAATTTACATATATattaAAGATA
	Mbp (NM_010777.3)	Mbp_ugi34_prm_1	CCTTCTCAGCAGATAATTCTTAATGTTATCTT
		Mbp_ugi34_pdl_1	/5Phos/ACATTACTCTTTCCAGAGTGGTTTCCatttaTATATATAAATTCATCTTAattaAAGATA
		Mbp_ugi34_prm_2	CCTTGCCAGTTATTCTTTGGTAATGTTATCTT
		Mbp_ugi34_pdl_2	/5Phos/ACATTAGTCTGCTGTGTGCTTGGAGTatttaTATATATAAATTCATCTTAattaAAGATA
		Mbp_ugi34_prm_3	AAGCTCGTCGGACTCTGAGGTAATGTTATCTT
		Mbp_ugi34_pdl_3	/5Phos/ACATTAGCCTGTCTTTGAAGGTGTTGatttaTATATATAAATTCATCTTAattaAAGATA
		Mbp_ugi34_prm_4	GAAGCCATGCCTGGCATGGTTAATGTTATCTT
		Mbp_ugi34_pdl_4	/5Phos/ACATTACCATGGTACTTGCTGTGGCCatttaTATATATAAATTCATCTTAattaAAGATA
	Hexb (NM_010422.2)	Hexb_ugi35_prm_1	TCGATGCTGAAGTCCTCCGCTAATGTTATCTT
		Hexb_ugi35_pdl_1	/5Phos/ACATTAGGAGATGTACAACAGCCGCGatttaTTACTATCTCAATAAATATattaAAGATA
		Hexb_ugi35_prm_2	TCAGCTCGAAATCTAGCAGGTAATGTTATCTT
		Hexb_ugi35_pdl_2	/5Phos/ACATTAGCCATGATGTCTCTTGTAGAatttaTTACTATCTCAATAAATATattaAAGATA
		Hexb_ugi35_prm_3	TCTAAACCTCGTAACGCTCCTAATGTTATCTT
		Hexb_ugi35_pdl_3	/5Phos/ACATTACCAAACGCTGTTGGCCTTGAatttaTTACTATCTCAATAAATATattaAAGATA
		Hexb_ugi35_prm_4	AGACTGGTCGTCCACTATGTTAATGTTATCTT
		Hexb_ugi35_pdl_4	/5Phos/ACATTAGCCAGTGAAGAACATTAAACatttaTTACTATCTCAATAAATATattaAAGATA
	Cldn5 (NM_013805.4)	Cldn5_ugi36_prm_1	ACCAGACACAGCACCAGACCTAATGTTATCTT
		Cldn5_ugi36_pdl_1	/5Phos/ACATTACAGAATTTCCAACGCTGCAGatttaCACTTAAATATATTATAACattaAAGATA
		Cldn5_ugi36_prm_2	CACGATGTTGTGGTCCAGGATAATGTTATCTT
		Cldn5_ugi36_pdl_2	/5Phos/ACATTAAGGCAGTCACCTGCCACATGatttaCACTTAAATATATTATAACattaAAGATA
		Cldn5_ugi36_prm_3	AGCGCCAGCACAGATTCATATAATGTTATCTT
		Cldn5_ugi36_pdl_3	/5Phos/ACATTACACCTTGCACTGCATGTGCCatttaCACTTAAATATATTATAACattaAAGATA
		Cldn5_ugi36_prm_4	TGAGCGCCGGTCAAGGTAACTAATGTTATCTT
		Cldn5_ugi36_pdl_4	/5Phos/ACATTAAAAGAGTGCCACCAGCGCCAatttaCACTTAAATATATTATAACattaAAGATA
	Msr1 (NM_031195.2)	Msr1_ugi37_prm_1	GCATCCTCTTGTTCATGAGGTAATGTTATCTT
		Msr1_ugi37_pdl_1	/5Phos/ACATTAGCAGAGCCTCTGATTCTCTGatttaAATTATAATAATCTAACTCattaAAGATA
		Msr1_ugi37_prm_2	GGAGGTAGAGAGCAATGAGGTAATGTTATCTT
		Msr1_ugi37_pdl_2	/5Phos/ACATTAGCAGCCTTGAAGGACTTCAAatttaAATTATAATAATCTAACTCattaAAGATA
		Msr1_ugi37_prm_3	TCCATAGGACCTTGAGATGTTAATGTTATCTT
		Msr1_ugi37_pdl_3	/5Phos/ACATTAGTCACTTGTGTTAAGTGAACatttaAATTATAATAATCTAACTCattaAAGATA
		Msr1_ugi37_prm_4	TGAAATTCTGGAAGCGTTCCTAATGTTATCTT
		Msr1_ugi37_pdl_4	/5Phos/ACATTAGTGTCTATAAGGTCGGCTTTatttaAATTATAATAATCTAACTCattaAAGATA
	Acta2 (NM_007392.3)	Acta2_ugi38_prm_1	AGCCATTGTCGCACACCAGGTAATGTTATCTT
		Acta2_ugi38_pdl_1	/5Phos/ACATTAGCTGTGCTGTCTTCCTCTTCatttaTTATTAACATTAATTACACattaAAGATA
		Acta2_ugi38_prm_2	ATGATGCCGTGTTCTATCGGTAATGTTATCTT
		Acta2_ugi38_pdl_2	/5Phos/ACATTAATACTTCAGCGTCAGGATCCatttaTTATTAACATTAATTACACattaAAGATA
		Acta2_ugi38_prm_3	TCAGTGGTGCCTCTGTCAGCTAATGTTATCTT
		Acta2_ugi38_pdl_3	/5Phos/ACATTAAGTGTCGGATGCTCTTCAGGatttaTTATTAACATTAATTACACattaAAGATA
		Acta2_ugi38_prm_4	GTCCAGCACAATACCAGTTGTAATGTTATCTT
		Acta2_ugi38_pdl_4	/5Phos/ACATTATACGTCCAGAGGCATAGAGGatttaTTATTAACATTAATTACACattaAAGATA
	Pvalb (NM_013645.4)	Pvalb_ugi39_prm_1	TTCTTGATGTCCTCAGCGCTTAATGTTATCTT
		Pvalb_ugi39_pdl_1	/5Phos/ACATTAGAGCACGTCTGTCATCGACAatttaTATACTTCATATATAATAAattaAAGATA
		Pvalb_ugi39_prm_2	TTGTGGTCGAAGGAGTCTGCTAATGTTATCTT
		Pvalb_ugi39_pdl_2	/5Phos/ACATTAAGCAGCAAAGGCTCCTATCGatttaTATACTTCATATATAATAAattaAAGATA
		Pvalb_ugi39_prm_3	CTTTGTCCAGAATATGGAACTAATGTTATCTT
		Pvalb_ugi39_pdl_3	/5Phos/ACATTAACCTTCTTCACCTCATCCGGatttaTATACTTCATATATAATAAattaAAGATA
		Pvalb_ugi39_prm_4	GTTTCTTTAGCAGACAAGTCTAATGTTATCTT
		Pvalb_ugi39_pdl_4	/5Phos/ACATTATCTGGCATCTGAGGAGAAGCatttaTATACTTCATATATAATAAattaAAGATA
	Sst (NM_009215.1)	Sst_ugi40_prm_1	GCAGCCGCCAGAGACTTCTGTAATGTTATCTT
		Sst_ugi40_pdl_1	/5Phos/ACATTACAGAAACTGACGGAGTCTGGatttaTATAATATTACTTATCTCTattaAAGATA
		Sst_ugi40_prm_2	AGCAGCTCTGCCAAGAAGTATAATGTTATCTT
		Sst_ugi40_pdl_2	/5Phos/ACATTACTTGGCCAGTTCCTGTTTCCatttaTATAATATTACTTATCTCTattaAAGATA
		Sst_ugi40_prm_3	TCTGCAGCTCCAGCCTCATCTAATGTTATCTT
		Sst_ugi40_pdl_3	/5Phos/ACATTATCGTCCTGCTCAGCTGCCTGatttaTATAATATTACTTATCTCTattaAAGATA
		Sst_ugi40_prm_4	TGTCTTCCAGAAGAAGTTCTTAATGTTATCTT
		Sst_ugi40_pdl_4	/5Phos/ACATTATGCAGCCAGCTTTGCGTTCCatttaTATAATATTACTTATCTCTattaAAGATA
	Vip (NM_011702.3)	Vip_ugi41_prm_1	ATCAGGAATGCCAGGAACTGTAATGTTATCTT
		Vip_ugi41_pdl_1	/5Phos/ACATTAAGGCTTGCTTCTGGCTTCCAatttaATTCTATTAACCTATATATattaAAGATA
		Vip_ugi41_prm_2	GCAAGATGTCAGAGTCTGCTTAATGTTATCTT
		Vip_ugi41_pdl_2	/5Phos/ACATTATTTAAAGAGACTTGGTCAGGatttaATTCTATTAACCTATATATattaAAGATA
		Vip_ugi41_prm_3	GCTGCTGCTGATTCGTTTGCTAATGTTATCTT
		Vip_ugi41_pdl_3	/5Phos/ACATTACAATGAGTGACTCAAGGTATatttaATTCTATTAACCTATATATattaAAGATA
		Vip_ugi41_prm_4	GTTCAGGTATTTCTTCACAGTAATGTTATCTT
		Vip_ugi41_pdl_4	/5Phos/ACATTACCATTTGCTTTCTGAGGCGGatttaATTCTATTAACCTATATATattaAAGATA
readers		ugi1 R B2I2	TATTATTATATTTACCCTA AGCTCAGTCCATCCTCGTAAATCCTCATCAATCATC
		ugi9 R B2I2	TATATTCATTAACAATTAA AGCTCAGTCCATCCTCGTAAATCCTCATCAATCATC
		ugi16 R B3I2	TATAACACTATTTATCTAT AAAgTCTAATCCgTCCCTgCCTCTATATCTCCACTC
		ugi23 R B3I2	ACTACTATTTATATATCTA AAAgTCTAATCCgTCCCTgCCTCTATATCTCCACTC
		ugi25 R B5I2	ACTCTAACTAAATAATAAT CACTTCATATCACTCACTCCCAATCTCTATCTACCC
		ugi27 R B5I2	AAACTATATAATTATCTTA CACTTCATATCACTCACTCCCAATCTCTATCTACCC
		ugi31 R B2I2	ACTACAATACTAATTAATT AGCTCAGTCCATCCTCGTAAATCCTCATCAATCATC
		ugi32 R B3I2	TATCTAAACTTAATATTCT AAAgTCTAATCCgTCCCTgCCTCTATATCTCCACTC
		ugi33 R B4I2	TAATCAAATTTACATATAT CACATTTACAgACCTCAACCTACCTCCAACTCTCAC
		ugi34 R B5I2	TATATATAAATTCATCTTA CACTTCATATCACTCACTCCCAATCTCTATCTACCC
		ugi35 R B2I2	TTACTATCTCAATAAATAT AGCTCAGTCCATCCTCGTAAATCCTCATCAATCATC
		ugi36 R B3I2	CACTTAAATATATTATAAC AAAgTCTAATCCgTCCCTgCCTCTATATCTCCACTC
		ugi37 R B4I2	AATTATAATAATCTAACTC CACATTTACAgACCTCAACCTACCTCCAACTCTCAC
		ugi38 R B5I2	TTATTAACATTAATTACAC CACTTCATATCACTCACTCCCAATCTCTATCTACCC
		ugi39 R B2I2	TATACTTCATATATAATAA AGCTCAGTCCATCCTCGTAAATCCTCATCAATCATC
		ugi40 R B3I2	TATAATATTACTTATCTCT AAAgTCTAATCCgTCCCTgCCTCTATATCTCCACTC
		ugi41 R B4I2	ATTCTATTAACCTATATAT CACATTTACAgACCTCAACCTACCTCCAACTCTCAC

## Sheet: Fig. 4
* The same probes and readers for AAVs in Fig. 3 were used
* The same probes and readers for endogenous genes in Fig. 3 were used if not listed here
	Gene	Probe name	Sequence (5'->3')
Endogenous genes	Rorb (NM_001043354.2)	rorb_ugi107_prm_1	GATGACTCCGTAGTGGATCCTAATGTTATCTT
		rorb_ugi107_pdl_1	/5Phos/ACATTACGGAGGATTTATCGCCACAAatttaTATATACTCTATCTTAAATattaAAGATA
		rorb_ugi107_prm_2	CAGGTTGCTGAGGCCATTGCTAATGTTATCTT
		rorb_ugi107_pdl_2	/5Phos/ACATTATAATGCTGCTGCTGTACACCatttaTATATACTCTATCTTAAATattaAAGATA
		rorb_ugi107_prm_3	ATGGAGTTCTTCCATGGTGTTAATGTTATCTT
		rorb_ugi107_pdl_3	/5Phos/ACATTAACTGACATGTCTCCAAATGGatttaTATATACTCTATCTTAAATattaAAGATA
		rorb_ugi107_prm_4	TCATCCGAACCTAAGGCTTTTAATGTTATCTT
		rorb_ugi107_pdl_4	/5Phos/ACATTAGAACATTTGCATTCCTCCATatttaTATATACTCTATCTTAAATattaAAGATA
	Chrna6 (NM_021369.2)	chrna6_ugi108_prm_1	CTTCAGATTCACAGCCTGTATAATGTTATCTT
		chrna6_ugi108_pdl_1	/5Phos/ACATTACTGCCTTTAAAGAGAGCCAGatttaATAATTATATATTCAATTCattaAAGATA
		chrna6_ugi108_prm_2	AGATGTGACGCAGCCACAGATAATGTTATCTT
		chrna6_ugi108_pdl_2	/5Phos/ACATTATTGGTCTCCATAATCTGGTTatttaATAATTATATATTCAATTCattaAAGATA
		chrna6_ugi108_prm_3	TTCGACCTGGAAGTCGCCGATAATGTTATCTT
		chrna6_ugi108_pdl_3	/5Phos/ACATTACAGCATTGTTATACAGAACGatttaATAATTATATATTCAATTCattaAAGATA
		chrna6_ugi108_prm_4	GGAGTAGGTTATGTCCGTGTTAATGTTATCTT
		chrna6_ugi108_pdl_4	/5Phos/ACATTAAAATCTCTTCACAGCAGTTGatttaATAATTATATATTCAATTCattaAAGATA
	Trh (NM_009426.3)	trh_ugi109_prm_1	GCACGAAGATCAAAGCCAGATAATGTTATCTT
		trh_ugi109_pdl_1	/5Phos/ACATTAGCCATCATCAGCCAAGGTCCatttaTTAACACTAATTTATTACAattaAAGATA
		trh_ugi109_prm_2	GCTGGAGGTCTTTCCTCAAGTAATGTTATCTT
		trh_ugi109_pdl_2	/5Phos/ACATTAAATCGACGTTCTGGCCGGACatttaTTAACACTAATTTATTACAattaAAGATA
		trh_ugi109_prm_3	AGAACCAGGAATCCAGAAAGTAATGTTATCTT
		trh_ugi109_pdl_3	/5Phos/ACATTAAAATCTGGTAGCCAGGACGGatttaTTAACACTAATTTATTACAattaAAGATA
		trh_ugi109_prm_4	TCACCTAGAAGCTGGAGCAGTAATGTTATCTT
		trh_ugi109_pdl_4	/5Phos/ACATTAGCCTGTTTGGCCACAAATCCatttaTTAACACTAATTTATTACAattaAAGATA
	Hsd11b1 (NM_008288.2)	hsd11b1_ugi110_prm_1	TAGAATAGTAGTAGTAGGCCTAATGTTATCTT
		hsd11b1_ugi110_pdl_1	/5Phos/ACATTAAGGAAGAGCACCAGGATCGGatttaATACTATAATATCACTATTattaAAGATA
		hsd11b1_ugi110_prm_2	TAGTGAGCAGAGGCTGCTCCTAATGTTATCTT
		hsd11b1_ugi110_pdl_2	/5Phos/ACATTAGAGTTCAAGGCAGCGAGACAatttaATACTATAATATCACTATTattaAAGATA
		hsd11b1_ugi110_prm_3	TGCTCATGACCACGTAGCTGTAATGTTATCTT
		hsd11b1_ugi110_pdl_3	/5Phos/ACATTAAGGAAGTTGACCTCCATGACatttaATACTATAATATCACTATTattaAAGATA
		hsd11b1_ugi110_prm_4	TTCTGTGTCTATGAGGCCAATAATGTTATCTT
		hsd11b1_ugi110_pdl_4	/5Phos/ACATTAGGACACAGAGAGTGATGGACatttaATACTATAATATCACTATTattaAAGATA
	Rprm (NM_023396.5)	rprm_ugi113_prm_1	CTGTTGACCAGGAACAGGCCTAATGTTATCTT
		rprm_ugi113_pdl_1	/5Phos/ACATTAAGCCACGTCGGTCTGGTTGCatttaTATACATAATAATAACTATattaAAGATA
		rprm_ugi113_prm_2	GATCTGCACCACACGCATGATAATGTTATCTT
		rprm_ugi113_pdl_2	/5Phos/ACATTATGTACAGGCTGCGCTCGTCGatttaTATACATAATAATAACTATattaAAGATA
		rprm_ugi113_prm_3	CCAAGGAAGAAGATGCCAAATAATGTTATCTT
		rprm_ugi113_pdl_3	/5Phos/ACATTAAACCACAGTGAGCGAGAGCAatttaTATACATAATAATAACTATattaAAGATA
		rprm_ugi113_prm_4	AGGAAGTTGATCATGCCTTCTAATGTTATCTT
		rprm_ugi113_pdl_4	/5Phos/ACATTAGGACTTGATGAGCAGGTTGCatttaTATACATAATAATAACTATattaAAGATA
	Crym (NM_016669.2)	crym_ugi114_prm_1	AGCTGCGAAGGTGATCCTGCTAATGTTATCTT
		crym_ugi114_pdl_1	/5Phos/ACATTAACCTCCTCTGCGCTCAGGAAatttaTATAAACTTAACATTACTTattaAAGATA
		crym_ugi114_prm_2	CTGCTCTGTGAAGATCTCATTAATGTTATCTT
		crym_ugi114_pdl_2	/5Phos/ACATTAAGTGACTGTACGCCTGGACCatttaTATAAACTTAACATTACTTattaAAGATA
		crym_ugi114_prm_3	AGTTCTCGCCAGTCAGGCCTTAATGTTATCTT
		crym_ugi114_pdl_3	/5Phos/ACATTAGCTGGCTCCAACAGCATTGAatttaTATAAACTTAACATTACTTattaAAGATA
		crym_ugi114_prm_4	CAGGTCTTCCACTGCCATCCTAATGTTATCTT
		crym_ugi114_pdl_4	/5Phos/ACATTACCAAAGATTTGAACACTGTGatttaTATAAACTTAACATTACTTattaAAGATA
	Gad1 (NM_008077.5)	gad1_ugi115_prm_1	CAAGTATCATACGTTGTAGGTAATGTTATCTT
		gad1_ugi115_pdl_1	/5Phos/ACATTAGCGCAGGTTGGTAGTATTAGatttaATAACACTATACTTTAATAattaAAGATA
		gad1_ugi115_prm_2	GGTGGAGCGATCAAATGTCTTAATGTTATCTT
		gad1_ugi115_pdl_2	/5Phos/ACATTATGCGGACATAGTTGAGGAGTatttaATAACACTATACTTTAATAattaAAGATA
		gad1_ugi115_prm_3	CGATCTCTCTCATCTTCTTATAATGTTATCTT
		gad1_ugi115_pdl_3	/5Phos/ACATTAAGAGTAATCTGTTCCATGAGatttaATAACACTATACTTTAATAattaAAGATA
		gad1_ugi115_prm_4	TCCGTAAACAGTCGTGCCTGTAATGTTATCTT
		gad1_ugi115_pdl_4	/5Phos/ACATTACGGTTGCATTGACATAAAGGatttaATAACACTATACTTTAATAattaAAGATA
	Lamp5 (NM_029530.3)	lamp5_ugi116_prm_1	AGTCTGTCTCCACCAAGAAGTAATGTTATCTT
		lamp5_ugi116_pdl_1	/5Phos/ACATTAGGTTCTTACTCGGAGATCCAatttaAACTATATCTATAACAATTattaAAGATA
		lamp5_ugi116_prm_2	CTCAGCCTGTTCTGTGATCATAATGTTATCTT
		lamp5_ugi116_pdl_2	/5Phos/ACATTAGATCCACATAATTGCTGGCCatttaAACTATATCTATAACAATTattaAAGATA
		lamp5_ugi116_prm_3	TCCGAGGAATCATAGACAAATAATGTTATCTT
		lamp5_ugi116_pdl_3	/5Phos/ACATTAATGCACCTTGTTCAGATTCCatttaAACTATATCTATAACAATTattaAAGATA
		lamp5_ugi116_prm_4	CCACTGGACATTTATGTTCTTAATGTTATCTT
		lamp5_ugi116_pdl_4	/5Phos/ACATTATCACTGAAGACAAAGTCAGAatttaAACTATATCTATAACAATTattaAAGATA
	Sncg (NM_011430.3)	sncg_ugi117_prm_1	CCTTCCTTGGCAATGGAGAATAATGTTATCTT
		sncg_ugi117_pdl_1	/5Phos/ACATTAGCCTTTCTTGAAGACGTCCAatttaTATATTAATACACTAATAAattaAAGATA
		sncg_ugi117_prm_2	GCCACTGAGGTGACACTTTGTAATGTTATCTT
		sncg_ugi117_pdl_2	/5Phos/ACATTATACCACGTTCTCCTTGGTTTatttaTATATTAATACACTAATAAattaAAGATA
		sncg_ugi117_prm_3	TCCTCCACGGTCTTGTTGGCTAATGTTATCTT
		sncg_ugi117_pdl_3	/5Phos/ACATTACACTGTGTTGACGCTGCTGAatttaTATATTAATACACTAATAAattaAAGATA
		sncg_ugi117_prm_4	CATTCTCCTCTTGCTCTTTGTAATGTTATCTT
		sncg_ugi117_pdl_4	/5Phos/ACATTAGCTTCTTGGTCCTGTGCAGGatttaTATATTAATACACTAATAAattaAAGATA
	Krt73 (NM_212485.3)	krt73_ugi119_prm_1	CTGTTGGCAACTCCAGGTTTTAATGTTATCTT
		krt73_ugi119_pdl_1	/5Phos/ACATTAGCAGGTGAATTGGCGATTCAatttaTTAATTAACTATCTAACAAattaAAGATA
		krt73_ugi119_prm_2	GAAGGAGGCGAATTTGTTGTTAATGTTATCTT
		krt73_ugi119_pdl_2	/5Phos/ACATTATCAGAGCCTTGATCTGCTCCatttaTTAATTAACTATCTAACAAattaAAGATA
		krt73_ugi119_prm_3	GCTCATGTATGCGGCATCCATAATGTTATCTT
		krt73_ugi119_pdl_3	/5Phos/ACATTACATCCTTCTTAAGCACTACAatttaTTAATTAACTATCTAACAAattaAAGATA
		krt73_ugi119_prm_4	AGATCTCATTCCTGGTGTGCTAATGTTATCTT
		krt73_ugi119_pdl_4	/5Phos/ACATTATTGAGGTCATCTCCGTGCCGatttaTTAATTAACTATCTAACAAattaAAGATA
	Tac1 (NM_009311.3)	tac1_ugi121_prm_1	CATCGATTTCCTCTGCAAACTAATGTTATCTT
		tac1_ugi121_pdl_1	/5Phos/ACATTAAGTTGAGTGGAAACGAGAAAatttaAATATACTTATACTTCATTattaAAGATA
		tac1_ugi121_prm_2	TGATCTGGTCACTGTCGGACTAATGTTATCTT
		tac1_ugi121_pdl_2	/5Phos/ACATTACAGTCGGACCAATAATTTAGatttaAATATACTTATACTTCATTattaAAGATA
		tac1_ugi121_prm_3	GTGAGAGATCTGGCCATGTCTAATGTTATCTT
		tac1_ugi121_pdl_3	/5Phos/ACATTACATAAAGAGCCTTTAACAGGatttaAATATACTTATACTTCATTattaAAGATA
		tac1_ugi121_prm_4	GCATCGCGCTTCTTTCATAATAATGTTATCTT
		tac1_ugi121_pdl_4	/5Phos/ACATTAGCCACAGAATTTAAAGCTCTatttaAATATACTTATACTTCATTattaAAGATA
	Crh (NM_205769.3)	crh_ugi122_prm_1	CTGCAAGGCAGGCAGGACGATAATGTTATCTT
		crh_ugi122_pdl_1	/5Phos/ACATTACAGAGCCACCAGCAGCATGCatttaATCTATCCAATATATAAATattaAAGATA
		crh_ugi122_prm_2	GCGGAGGAAGTATTCTTCACTAATGTTATCTT
		crh_ugi122_pdl_2	/5Phos/ACATTACCATGCGGATCAGAACCGGCatttaATCTATCCAATATATAAATattaAAGATA
		crh_ugi122_prm_3	GCTGCAGCAACACGCGGAAATAATGTTATCTT
		crh_ugi122_pdl_3	/5Phos/ACATTAAAGTTAGCCGCAGCCTGGTCatttaATCTATCCAATATATAAATattaAAGATA
		crh_ugi122_prm_4	TTTCCTGTTGCTGTGAGCTTTAATGTTATCTT
		crh_ugi122_pdl_4	/5Phos/ACATTAGCTGAGCTAACTGCTCTGCCatttaATCTATCCAATATATAAATattaAAGATA
	Th (NM_009377.2)	th_ugi123_prm_1	CCTGCTTGGTATCCTGCTCTTAATGTTATCTT
		th_ugi123_pdl_1	/5Phos/ACATTAGAGACGGCTCTTCTGAAGCCatttaCTATATTAAATTAAATCTAattaAAGATA
		th_ugi123_prm_2	TGCGCACATCGTCAGACACCTAATGTTATCTT
		th_ugi123_pdl_2	/5Phos/ACATTACGACGCACAGAACTGAGGAGatttaCTATATTAAATTAAATCTAattaAAGATA
		th_ugi123_prm_3	AGACACATCCTCCAGCTGTGTAATGTTATCTT
		th_ugi123_pdl_3	/5Phos/ACATTAGAATGCTGTCCTCTCGGTAGatttaCTATATTAAATTAAATCTAattaAAGATA
		th_ugi123_prm_4	GACACGAAGTACACCGGCTGTAATGTTATCTT
		th_ugi123_pdl_4	/5Phos/ACATTAGTAGGTTTGATCTTGGTAGGatttaCTATATTAAATTAAATCTAattaAAGATA
	Tpbg (NM_011627.4)	tpbg_ugi127_prm_1	ATCTGGTTGCCGGTAAGGAATAATGTTATCTT
		tpbg_ugi127_pdl_1	/5Phos/ACATTAAAGGTTGCGCACGTAAGGCGatttaTATATATTACACTCTATTAattaAAGATA
		tpbg_ugi127_prm_2	ATTGCTGGCTAGCTCCAGGCTAATGTTATCTT
		tpbg_ugi127_pdl_2	/5Phos/ACATTAGTGTAAGACCTCGGAGTGCAatttaTATATATTACACTCTATTAattaAAGATA
		tpbg_ugi127_prm_3	TGTGTCAGGTTGCGGAAGGATAATGTTATCTT
		tpbg_ugi127_pdl_3	/5Phos/ACATTATGCGTAGGTCAGGCTCACCAatttaTATATATTACACTCTATTAattaAAGATA
		tpbg_ugi127_prm_4	AAGCCAAGCCACCATGTCAGTAATGTTATCTT
		tpbg_ugi127_pdl_4	/5Phos/ACATTACCATGTAGCAGTCGCAAACCatttaTATATATTACACTCTATTAattaAAGATA
	Reln (NM_011261.2)	reln_ugi128_prm_1	GTCACCAGCAAGCCATCAAATAATGTTATCTT
		reln_ugi128_pdl_1	/5Phos/ACATTAGAAGGTGCTTGTTGAAATTGatttaTATAATTCACTATATCAATattaAAGATA
		reln_ugi128_prm_2	GTAAGCAGTGGCCTCTGTGGTAATGTTATCTT
		reln_ugi128_pdl_2	/5Phos/ACATTAGAGCTCCTTGTTCACACAGCatttaTATAATTCACTATATCAATattaAAGATA
		reln_ugi128_prm_3	GTATGACACAGTGATGCTGGTAATGTTATCTT
		reln_ugi128_pdl_3	/5Phos/ACATTAGGTCAGAGTAACTAAATCGAatttaTATAATTCACTATATCAATattaAAGATA
		reln_ugi128_prm_4	CCACTGCTCTTGAATATCCTTAATGTTATCTT
		reln_ugi128_pdl_4	/5Phos/ACATTACTGTAGAAAGATCTACATCCatttaTATAATTCACTATATCAATattaAAGATA
	Gad2 (NM_008078.2)	gad2_ugi142_prm_1	TCAGGATCCGCAGAGCCATCTAATGTTATCTT
		gad2_ugi142_pdl_1	/5Phos/ACATTATTCAGATCCGAAGGACCAAAatttaAATTCTATTAATACACTTAattaAAGATA
		gad2_ugi142_prm_2	CAGCAGGTCTGTTGCGTGCATAATGTTATCTT
		gad2_ugi142_pdl_2	/5Phos/ACATTAGAAACGCGTAGTTGACATCCatttaAATTCTATTAATACACTTAattaAAGATA
		gad2_ugi142_prm_3	CTCTTGAAGAAGCTCATTGGTAATGTTATCTT
		gad2_ugi142_pdl_3	/5Phos/ACATTAGGTAATGGAAATCGATCACTatttaAATTCTATTAATACACTTAattaAAGATA
		gad2_ugi142_prm_4	GTGAACATGTTAGTGTTTGCTAATGTTATCTT
		gad2_ugi142_pdl_4	/5Phos/ACATTATGTTGATGTCAACCAGTCTGatttaAATTCTATTAATACACTTAattaAAGATA
	Pcp4 (NM_008791.3)	pcp4_ugi144_prm_1	TTCTTGGACTTTCTTCTGCCTAATGTTATCTT
		pcp4_ugi144_pdl_1	/5Phos/ACATTACATCATTATCTCCTGACGTCatttaCATAACTTTATAACTATTTattaAAGATA
		pcp4_ugi144_prm_2	CTGCACGCTCTGTCTCTGGTTAATGTTATCTT
		pcp4_ugi144_pdl_2	/5Phos/ACATTAGCATCCATGTCGATATCAAAatttaCATAACTTTATAACTATTTattaAAGATA
	Cux2 (NM_007804.2)	cux2_ugi32_prm_1	ACCACCTCAGCCTGGAAGCTTAATGTTATCTT
		cux2_ugi32_pdl_1	/5Phos/ACATTACTTCAGCACCGGAGCTACCAatttaTATCTAAACTTAATATTCTattaAAGATA
		cux2_ugi32_prm_2	GCAGTCTGTCGTCTAGAGTCTAATGTTATCTT
		cux2_ugi32_pdl_2	/5Phos/ACATTACGCGCCACCTCAAATGATGGatttaTATCTAAACTTAATATTCTattaAAGATA
		cux2_ugi32_prm_3	CTCGGCCTCATTCTTCTGCATAATGTTATCTT
		cux2_ugi32_pdl_3	/5Phos/ACATTAGCAAGGTGTCTGTCACGAGGatttaTATCTAAACTTAATATTCTattaAAGATA
		cux2_ugi32_prm_4	CTGTCTGTGTGGCCTTTAGCTAATGTTATCTT
		cux2_ugi32_pdl_4	/5Phos/ACATTAGCTGAATGTAACACCTTGATatttaTATCTAAACTTAATATTCTattaAAGATA
	Ctgf (NM_010217.2)	ctgf_ugi33_prm_1	CACCATCTTTGGCAGTGCACTAATGTTATCTT
		ctgf_ugi33_pdl_1	/5Phos/ACATTAACTCCGATCTTGCGGTTGGCatttaTAATCAAATTTACATATATattaAAGATA
		ctgf_ugi33_prm_2	GGTATTTGCAGCTGCTTTGGTAATGTTATCTT
		ctgf_ugi33_pdl_2	/5Phos/ACATTAAAGGACTCACCGCTGCGGTAatttaTAATCAAATTTACATATATattaAAGATA
		ctgf_ugi33_prm_3	TCTGTGGTCTGGACCAGGCATAATGTTATCTT
		ctgf_ugi33_pdl_3	/5Phos/ACATTAGTTGGCTCGCATCATAGTTGatttaTAATCAAATTTACATATATattaAAGATA
		ctgf_ugi33_prm_4	CTTCTCCAGTCTGCAGAAGGTAATGTTATCTT
		ctgf_ugi33_pdl_4	/5Phos/ACATTATATTGTCATTGGTAACTCGGatttaTAATCAAATTTACATATATattaAAGATA
	Foxp2 (NM_053242.4)	foxp2_ugi35_prm_1	GAACTGTTGCTTATTGTCTCTAATGTTATCTT
		foxp2_ugi35_pdl_1	/5Phos/ACATTATGTCGCAGATTCCTGCATCAatttaTTACTATCTCAATAAATATattaAAGATA
		foxp2_ugi35_prm_2	ACTGTGCTTACTTCAGAGCTTAATGTTATCTT
		foxp2_ugi35_pdl_2	/5Phos/ACATTAGGTGTCACCACTTGATCTCCatttaTTACTATCTCAATAAATATattaAAGATA
		foxp2_ugi35_prm_3	CTTAGGAGATTTCAATCCACTAATGTTATCTT
		foxp2_ugi35_pdl_3	/5Phos/ACATTATGGTTTGCTGCTGTAACAAAatttaTTACTATCTCAATAAATATattaAAGATA
		foxp2_ugi35_prm_4	ACAGGACCTGCTGCTGAAGATAATGTTATCTT
		foxp2_ugi35_pdl_4	/5Phos/ACATTAATCTGCTGCATCTGCTGAGGatttaTTACTATCTCAATAAATATattaAAGATA
	Foxp1 (NM_053202.2)	foxp1_ugi36_prm_1	ACCGAGTGTCACGAAGTGCCTAATGTTATCTT
		foxp1_ugi36_pdl_1	/5Phos/ACATTACCGCACTCTAGTAAGTGGTTatttaCACTTAAATATATTATAACattaAAGATA
		foxp1_ugi36_prm_2	TGCTGCTGTTGCTGCTGCTGTAATGTTATCTT
		foxp1_ugi36_pdl_2	/5Phos/ACATTAAAGGAGGAGCTGCCTTGCCAatttaCACTTAAATATATTATAACattaAAGATA
		foxp1_ugi36_prm_3	GTTGCTTGTCATTCCTCTTGTAATGTTATCTT
		foxp1_ugi36_pdl_3	/5Phos/ACATTAGGAGACTTTAATCCACTAACatttaCACTTAAATATATTATAACattaAAGATA
		foxp1_ugi36_prm_4	GCTGTTGGAGAAGTTGAAGCTAATGTTATCTT
		foxp1_ugi36_pdl_4	/5Phos/ACATTATGCAACTGTTCCTGTTGTTTatttaCACTTAAATATATTATAACattaAAGATA
	Calb2 (NM_007586.2)	calb2_ugi37_prm_1	TCCGTCAGCATCAAAGTGCTTAATGTTATCTT
		calb2_ugi37_pdl_1	/5Phos/ACATTATCCAGATTTCCAGGAACTGGatttaAATTATAATAATCTAACTCattaAAGATA
		calb2_ugi37_prm_2	TCCTTCATCTTCTCTCCAAATAATGTTATCTT
		calb2_ugi37_pdl_2	/5Phos/ACATTAATTGTCGCTCTTGGACATCAatttaAATTATAATAATCTAACTCattaAAGATA
		calb2_ugi37_prm_3	CGTGCTGCCTGAAGCACAAATAATGTTATCTT
		calb2_ugi37_pdl_3	/5Phos/ACATTAAGGAAATTCTCTTCGGTCGGatttaAATTATAATAATCTAACTCattaAAGATA
		calb2_ugi37_prm_4	GAGCTTAGGTTCATCATAGGTAATGTTATCTT
		calb2_ugi37_pdl_4	/5Phos/ACATTAGCCTGTTGGCCTTCTTCAGGatttaAATTATAATAATCTAACTCattaAAGATA
	Calb1 (NM_009788.4)	calb1_ugi38_prm_1	TAACCACTTCCGTCAGCGTCTAATGTTATCTT
		calb1_ugi38_pdl_1	/5Phos/ACATTAGAAATGAAGCCAGATCTCAAatttaTTATTAACATTAATTACACattaAAGATA
		calb1_ugi38_prm_2	ATTTCCGGTGATAGCTCCAATAATGTTATCTT
		calb1_ugi38_pdl_2	/5Phos/ACATTATCCAGCCTTCTTTCGCGCCTatttaTTATTAACATTAATTACACattaAAGATA
		calb1_ugi38_prm_3	CAAGAAATTCTCTTCTGTGGTAATGTTATCTT
		calb1_ugi38_pdl_3	/5Phos/ACATTAGTAAGACGTGAGCCAACTCTatttaTTATTAACATTAATTACACattaAAGATA
		calb1_ugi38_prm_4	GAAGCCGCTGTGGTCAGTATTAATGTTATCTT
		calb1_ugi38_pdl_4	/5Phos/ACATTACATACTTTCTCCAAGTCTTCatttaTTATTAACATTAATTACACattaAAGATA
	Drd1 (NM_010076.3)	drd1_ugi42_prm_1	GGCAGGCCAGTCTCATCCATTAATGTTATCTT
		drd1_ugi42_pdl_1	/5Phos/ACATTAGGTAGAAGTGTTAGGAGCCAatttaTAAACTAATACATATTAACattaAAGATA
		drd1_ugi42_prm_2	CCGCAGGTGTCGAAACCTGATAATGTTATCTT
		drd1_ugi42_pdl_2	/5Phos/ACATTATGACAGCGGCACAGACAAGGatttaTAAACTAATACATATTAACattaAAGATA
		drd1_ugi42_prm_3	CTCAGCCACAGCTTTCCAGGTAATGTTATCTT
		drd1_ugi42_pdl_3	/5Phos/ACATTAGCATGACCAAGACAGCCACCatttaTAAACTAATACATATTAACattaAAGATA
		drd1_ugi42_prm_4	AGGCTGCCTTCGGAGTCATCTAATGTTATCTT
		drd1_ugi42_pdl_4	/5Phos/ACATTATTCCTCTCATACTGGAAAGGatttaTAAACTAATACATATTAACattaAAGATA
	Drd2 (NM_010077.3)	drd2_ugi43_prm_1	TCCAGATCATCATCGTACCATAATGTTATCTT
		drd2_ugi43_pdl_1	/5Phos/ACATTAGGACAGGTTCAGTGGATCCAatttaATAACTAACAACTATTATAattaAAGATA
		drd2_ugi43_prm_2	CGATGATAAAGATGAGGAGGTAATGTTATCTT
		drd2_ugi43_pdl_2	/5Phos/ACATTAGTGAGCAGCATGGCATAGTAatttaATAACTAACAACTATTATAattaAAGATA
		drd2_ugi43_prm_3	CGAGGCTGACTATCAGGTAGTAATGTTATCTT
		drd2_ugi43_pdl_3	/5Phos/ACATTATTGGTGGTGGTCTGCAAAGCatttaATAACTAACAACTATTATAattaAAGATA
		drd2_ugi43_prm_4	CACATCATGACATCCAGAGTTAATGTTATCTT
		drd2_ugi43_pdl_4	/5Phos/ACATTAGACAAAGATGTCACAGTGAAatttaATAACTAACAACTATTATAattaAAGATA
	Prkcd (NM_011103.3)	prkcd_ugi44_prm_1	AGCACAGAAAGGCTGGCTTGTAATGTTATCTT
		prkcd_ugi44_pdl_1	/5Phos/ACATTACTTCGTCCTCAACTTGCAGGatttaTACAATCTAACTATTATAAattaAAGATA
		prkcd_ugi44_prm_2	CCACTCAGGATACATGGTGGTAATGTTATCTT
		prkcd_ugi44_pdl_2	/5Phos/ACATTAGCTTCTTCTGTACCAGTGTCatttaTACAATCTAACTATTATAAattaAAGATA
		prkcd_ugi44_prm_3	CGTTGTTCTTCTTGCAGCGCTAATGTTATCTT
		prkcd_ugi44_pdl_3	/5Phos/ACATTATCAGCCAGTACTGACACGCCatttaTACAATCTAACTATTATAAattaAAGATA
		prkcd_ugi44_prm_4	GCATAGACTGTTTGCAATCCTAATGTTATCTT
		prkcd_ugi44_pdl_4	/5Phos/ACATTACCATCCTCCAGGAAATACTGatttaTACAATCTAACTATTATAAattaAAGATA
	Tnnt1 (NM_011618.2)	tnnt1_ugi45_prm_1	GCCTGCTCCTCCTCATATTCTAATGTTATCTT
		tnnt1_ugi45_pdl_1	/5Phos/ACATTATTGTTCTTCGGTGTCTGACAatttaAATTTAACTATACTATATAattaAAGATA
		tnnt1_ugi45_prm_2	GTAAGTCTTTCTCCATGCGCTAATGTTATCTT
		tnnt1_ugi45_pdl_2	/5Phos/ACATTATTCCGGTGGATGTCATCAAAatttaAATTTAACTATACTATATAattaAAGATA
		tnnt1_ugi45_prm_3	CGCCTCTCAATGCGGTCTTTTAATGTTATCTT
		tnnt1_ugi45_pdl_3	/5Phos/ACATTATAGTGCAATGAGCTCTTCCTatttaAATTTAACTATACTATATAattaAAGATA
		tnnt1_ugi45_prm_4	TCTTTGCCTCCTCCTCCTCCTAATGTTATCTT
		tnnt1_ugi45_pdl_4	/5Phos/ACATTATTCCGCATCTTCTCCTCCGCatttaAATTTAACTATACTATATAattaAAGATA
	Necab1 (NM_022351.5)	necab1_ugi46_prm_1	TGAGCTCCTCCGAGGAGTTGTAATGTTATCTT
		necab1_ugi46_pdl_1	/5Phos/ACATTATTGGAGGACGGCGATGTCTCatttaAACATTATACTATACTATTattaAAGATA
		necab1_ugi46_prm_2	GCTCGTGTAATTCTTCTCCATAATGTTATCTT
		necab1_ugi46_pdl_2	/5Phos/ACATTACTGAGAACACCATCTGCAAAatttaAACATTATACTATACTATTattaAAGATA
		necab1_ugi46_prm_3	TCAGGTCTTCAAGTGCTGCTTAATGTTATCTT
		necab1_ugi46_pdl_3	/5Phos/ACATTAAGTACATTCTCATACTCGCCatttaAACATTATACTATACTATTattaAAGATA
		necab1_ugi46_prm_4	CGAATTGTTCCAAATTGGAGTAATGTTATCTT
		necab1_ugi46_pdl_4	/5Phos/ACATTAGCTTCTTGGTAGTCTTTCTTatttaAACATTATACTATACTATTattaAAGATA
	Ppp1r17 (NM_011153.4)	ppp1r17_ugi47_prm_1	AAAGCTCCAGAGGCGGCACTTAATGTTATCTT
		ppp1r17_ugi47_pdl_1	/5Phos/ACATTAGGCTCGGTGGTCATCATCTCatttaTTATTATCTACTAAATATCattaAAGATA
		ppp1r17_ugi47_prm_2	TGATCTGACTCAACATTCAGTAATGTTATCTT
		ppp1r17_ugi47_pdl_2	/5Phos/ACATTAAGTGGCCTGTACATTCTTCCatttaTTATTATCTACTAAATATCattaAAGATA
		ppp1r17_ugi47_prm_3	TCAGAGTTATGAAGAGCTGGTAATGTTATCTT
		ppp1r17_ugi47_pdl_3	/5Phos/ACATTAGCCTGATTTGGCCTTTGGAAatttaTTATTATCTACTAAATATCattaAAGATA
		ppp1r17_ugi47_prm_4	CCATTTCTTCATCCTCTAGATAATGTTATCTT
		ppp1r17_ugi47_pdl_4	/5Phos/ACATTAATCACTCCTGCACTCTCATCatttaTTATTATCTACTAAATATCattaAAGATA
	Gabra6 (NM_008068.3)	gabra6_ugi48_prm_1	TTCAGAGTAGAAGTTGCCTTTAATGTTATCTT
		gabra6_ugi48_pdl_1	/5Phos/ACATTACATCTTCAAGTTGAGCTTGGatttaTCTAATTAATAATCTACTAattaAAGATA
		gabra6_ugi48_prm_2	TGGTCACATAGATGTCTGTTTAATGTTATCTT
		gabra6_ugi48_pdl_2	/5Phos/ACATTATTGACTTCTGTTACAGCACCatttaTCTAATTAATAATCTACTAattaAAGATA
		gabra6_ugi48_prm_3	AGGATTGTTCCATTCTGCATTAATGTTATCTT
		gabra6_ugi48_pdl_3	/5Phos/ACATTATAATCGGAAGAGCTTGTTGGatttaTCTAATTAATAATCTACTAattaAAGATA
		gabra6_ugi48_prm_4	TTTAGGATAAGCATAGCTCCTAATGTTATCTT
		gabra6_ugi48_pdl_4	/5Phos/ACATTACAAACTTGAGTGGACAAGCGatttaTCTAATTAATAATCTACTAattaAAGATA
	Lgi2 (NM_144945.3)	lgi2_ugi49_prm_1	CACGCAGATGATGGACTCCTTAATGTTATCTT
		lgi2_ugi49_pdl_1	/5Phos/ACATTATGGTACAGCTGCAAGTGGCGatttaTCCATATAATAACTATTAAattaAAGATA
		lgi2_ugi49_prm_2	CCGTGAATGAGTTAGAATTCTAATGTTATCTT
		lgi2_ugi49_pdl_2	/5Phos/ACATTAAGCAATAGCAGCTGCAGAGAatttaTCCATATAATAACTATTAAattaAAGATA
		lgi2_ugi49_prm_3	GCCATAGATACAGCCATTTGTAATGTTATCTT
		lgi2_ugi49_pdl_3	/5Phos/ACATTAGCTTTGCAGTCACATTCAAAatttaTCCATATAATAACTATTAAattaAAGATA
		lgi2_ugi49_prm_4	TGGTCACTTCGTTGAGTTTCTAATGTTATCTT
		lgi2_ugi49_pdl_4	/5Phos/ACATTATTCTCCTGGTATTCTGGTGGatttaTCCATATAATAACTATTAAattaAAGATA
	Gdf10 (NM_145741.3)	gdf10_ugi50_prm_1	CTCATAGAGCCTGAGCATGTTAATGTTATCTT
		gdf10_ugi50_pdl_1	/5Phos/ACATTAGGATAGCGACCATGTCCTGGatttaATTAAATATACAACTATCTattaAAGATA
		gdf10_ugi50_prm_2	GTTGAAGAAATACACAGGCTTAATGTTATCTT
		gdf10_ugi50_pdl_2	/5Phos/ACATTATTTGGTCGATCATTTCCAGCatttaATTAAATATACAACTATCTattaAAGATA
		gdf10_ugi50_prm_3	AGGATGCGTTCTTAGCTCGGTAATGTTATCTT
		gdf10_ugi50_pdl_3	/5Phos/ACATTAGGCTTGCAGAATACCTCACGatttaATTAAATATACAACTATCTattaAAGATA
		gdf10_ugi50_prm_4	CAGCCTTGATGATTGAGGAGTAATGTTATCTT
		gdf10_ugi50_pdl_4	/5Phos/ACATTAATGTCCTTGGCCTGCCACAGatttaATTAAATATACAACTATCTattaAAGATA
readers		ugi107 R B5I2	TATATACTCTATCTTAAAT CACTTCATATCACTCACTCCCAATCTCTATCTACCC
		ugi108 R B2I2	ATAATTATATATTCAATTC AGCTCAGTCCATCCTCGTAAATCCTCATCAATCATC
		ugi109 R B3I2	TTAACACTAATTTATTACA AAAgTCTAATCCgTCCCTgCCTCTATATCTCCACTC
		ugi110 R B4I2	ATACTATAATATCACTATT CACATTTACAgACCTCAACCTACCTCCAACTCTCAC
		ugi113 R B3I2	TATACATAATAATAACTAT AAAgTCTAATCCgTCCCTgCCTCTATATCTCCACTC
		ugi114 R B4I2	TATAAACTTAACATTACTT CACATTTACAgACCTCAACCTACCTCCAACTCTCAC
		ugi115 R B5I2	ATAACACTATACTTTAATA CACTTCATATCACTCACTCCCAATCTCTATCTACCC
		ugi116 R B2I2	AACTATATCTATAACAATT AGCTCAGTCCATCCTCGTAAATCCTCATCAATCATC
		ugi117 R B3I2	TATATTAATACACTAATAA AAAgTCTAATCCgTCCCTgCCTCTATATCTCCACTC
		ugi119 R B5I2	TTAATTAACTATCTAACAA CACTTCATATCACTCACTCCCAATCTCTATCTACCC
		ugi121 R B3I2	AATATACTTATACTTCATT AAAgTCTAATCCgTCCCTgCCTCTATATCTCCACTC
		ugi122 R B4I2	ATCTATCCAATATATAAAT CACATTTACAgACCTCAACCTACCTCCAACTCTCAC
		ugi123 R B5I2	CTATATTAAATTAAATCTA CACTTCATATCACTCACTCCCAATCTCTATCTACCC
		ugi127 R B5I2	TATATATTACACTCTATTA CACTTCATATCACTCACTCCCAATCTCTATCTACCC
		ugi128 R B2I2	TATAATTCACTATATCAAT AGCTCAGTCCATCCTCGTAAATCCTCATCAATCATC
		ugi142 R B4I2	AATTCTATTAATACACTTA CACATTTACAgACCTCAACCTACCTCCAACTCTCAC
		ugi144 R B2I2	CATAACTTTATAACTATTT AGCTCAGTCCATCCTCGTAAATCCTCATCAATCATC
		ugi42 R B3I2	TAAACTAATACATATTAAC AAAgTCTAATCCgTCCCTgCCTCTATATCTCCACTC
		ugi43 R B4I2	ATAACTAACAACTATTATA CACATTTACAgACCTCAACCTACCTCCAACTCTCAC
		ugi44 R B5I2	TACAATCTAACTATTATAA CACTTCATATCACTCACTCCCAATCTCTATCTACCC
		ugi45 R B2I2	AATTTAACTATACTATATA AGCTCAGTCCATCCTCGTAAATCCTCATCAATCATC
		ugi46 R B3I2	AACATTATACTATACTATT AAAgTCTAATCCgTCCCTgCCTCTATATCTCCACTC
		ugi47 R B4I2	TTATTATCTACTAAATATC CACATTTACAgACCTCAACCTACCTCCAACTCTCAC
		ugi48 R B5I2	TCTAATTAATAATCTACTA CACTTCATATCACTCACTCCCAATCTCTATCTACCC
		ugi49 R B2I2	TCCATATAATAACTATTAA AGCTCAGTCCATCCTCGTAAATCCTCATCAATCATC
		ugi50 R B3I2	ATTAAATATACAACTATCT AAAgTCTAATCCgTCCCTgCCTCTATATCTCCACTC

## Sheet: Fig. 5
* The same probes and readers for endogenous genes in Fig. 3 and Fig. 4 were used if not listed here
	Gene	Probe name	Sequence (5'->3')
miRNA TS pool	mmu-mir-1a-1 (MIMAT0000123)	BC1-ugi1_primer	CAACTACCTATACCTCCCAT TAATGTTATCTT
		BC1-ugi1_padlock	/5Phos/ACATTA CCATACCTTACCACCTATCT attta TATTATTATATTTACCCTA atta AAGATA
	mmu-miR-7a-5p (MIMAT0000677)	BC70-ugi70_primer	ACTCACACTACCCTATACCA TAATGTTATCTT
		BC70-ugi70_padlock	/5Phos/ACATTA CTACCACCTATTCACCTCAT attta TTACATTACTAAATAATTC atta AAGATA
	mmu-miR-126a-3p (MIMAT0000138)	BC4-ugi4_primer	CCTAACCCTACTAATTCTCC TAATGTTATCTT
		BC4-ugi4_padlock	/5Phos/ACATTA TTCCTAACATACCCTCAACC attta TTAAATTTAACTACTCATA atta AAGATA
	mmu-miR-128-3p (MIMAT0000140)	BC7-ugi7_primer	CCCACCCTAATCCAATACTA TAATGTTATCTT
		BC7-ugi7_padlock	/5Phos/ACATTA TCTCACATACCTAAACACCC attta AATCTAACTAATAATTTCT atta AAGATA
	mmu-miR-132-5p (MIMAT0016984)	BC12-ugi12_primer	TTCCCAACCTATCATACTCC TAATGTTATCTT
		BC12-ugi12_padlock	/5Phos/ACATTA CCTAACCACTACTCATACAC attta TATATTCAAATTACACTAA atta AAGATA
	mmu-miR-133a-3p (MIMAT0000145)	BC13-ugi13_primer	CCAATTCACCTATCCTCACC TAATGTTATCTT
		BC13-ugi13_padlock	/5Phos/ACATTA ACCCACTACTAATCCTTCCC attta CTCATATAATTTCTTATAA atta AAGATA
	mmu-miR-139-5p (MIMAT0000656)	BC20-ugi20_primer	AATACCTCAATACACCACCC TAATGTTATCTT
		BC20-ugi20_padlock	/5Phos/ACATTA CTACACCCATATCATACCCA attta TAATATCTACATAATATTT atta AAGATA
	mmu-miR-181a-5p (MIMAT0000210)	BC28-ugi28_primer	CCATCAATCCTACTATCCCT TAATGTTATCTT
		BC28-ugi28_padlock	/5Phos/ACATTA CCAACTAACTACTCTCCACT attta CTAATTATACCAATATAAT atta AAGATA
	mmu-miR-204-5p (MIMAT0000237)	BC32-ugi32_primer	AACCTTACATACCCAACCCT TAATGTTATCTT
		BC32-ugi32_padlock	/5Phos/ACATTA CCCTCTACTATCCAACTAAC attta TATCTAAACTTAATATTCT atta AAGATA
	mmu-miR-221-3p (MIMAT0000669)	BC36-ugi36_primer	CACCACACCACACACACCAA TAATGTTATCTT
		BC36-ugi36_padlock	/5Phos/ACATTA CTCCCTAACCTATCCTCCTA attta CACTTAAATATATTATAAC atta AAGATA
	mmu-miR-433-3p (MIMAT0001420)	BC61-ugi61_primer	CCAAACCTAACCATAATCCC TAATGTTATCTT
		BC61-ugi61_padlock	/5Phos/ACATTA TACCCTTACACCCAATCCCT attta TCTTATCTAATATTTACTT atta AAGATA
	mmu-miR-451a (MIMAT0001632)	BC62-ugi62_primer	ACCCTCTATACAACCCTTCC TAATGTTATCTT
		BC62-ugi62_padlock	/5Phos/ACATTA CACCATAACCCTAACCACCC attta CTTAAATATTACTAATACA atta AAGATA
	no TS	BC76-ugi76_primer	CCTATCCTATACCCATCCTC TAATGTTATCTT
		BC76-ugi76_padlock	/5Phos/ACATTA CACTTACCTACACTACCCTA attta ATATCTAACATTAAACTAT atta AAGATA
endogenous genes	Fezf2 (NM_080433.3)	fezf2_ugi42_prm_1	CGATAGAGAAAGCTAGTGTTTAATGTTATCTT
		fezf2_ugi42_pdl_1	/5Phos/ACATTATTAGAAGTGGCCGGTGACGCatttaTAAACTAATACATATTAACattaAAGATA
		fezf2_ugi42_prm_2	GTAACTGAGCAGCGTCTTGGTAATGTTATCTT
		fezf2_ugi42_pdl_2	/5Phos/ACATTAACGGCACCTCGTAGCCTAGAatttaTAAACTAATACATATTAACattaAAGATA
		fezf2_ugi42_prm_3	GGAGTCCAGGTAGTTGAAGTTAATGTTATCTT
		fezf2_ugi42_pdl_3	/5Phos/ACATTAAGTAGAGAGAGCCGCTGGCAatttaTAAACTAATACATATTAACattaAAGATA
		fezf2_ugi42_prm_4	AACTTGTCCGCAGCCAGGCTTAATGTTATCTT
		fezf2_ugi42_pdl_4	/5Phos/ACATTAGGCCAGTTTGGCGTTCTCCAatttaTAAACTAATACATATTAACattaAAGATA
	Nxph4 (NM_183297.2)	nxph4_ugi43_prm_1	TAAGGAGCCAAGGACCAAAGTAATGTTATCTT
		nxph4_ugi43_pdl_1	/5Phos/ACATTAAGCAAGAGGAGCCATTCCGGatttaATAACTAACAACTATTATAattaAAGATA
		nxph4_ugi43_prm_2	ACCAACAGCGAGAACTTGAGTAATGTTATCTT
		nxph4_ugi43_pdl_2	/5Phos/ACATTAGGTATGCACACGAAAGTAAAatttaATAACTAACAACTATTATAattaAAGATA
		nxph4_ugi43_prm_3	CATATTCCACGTGGCAATTATAATGTTATCTT
		nxph4_ugi43_pdl_3	/5Phos/ACATTAAAAGCGCGCGACTCTTTGGCatttaATAACTAACAACTATTATAattaAAGATA
		nxph4_ugi43_prm_4	AAACTGAGGAAGGAGACGAATAATGTTATCTT
		nxph4_ugi43_pdl_4	/5Phos/ACATTAGATACAGATGACTTTGAAGGatttaATAACTAACAACTATTATAattaAAGATA
	Sulf1 (NM_172294.2)	sulf1_ugi44_prm_1	TCCTTCCTCGGAACCTCTGGTAATGTTATCTT
		sulf1_ugi44_pdl_1	/5Phos/ACATTAGACCGAACGGTGGAACACAGatttaTACAATCTAACTATTATAAattaAAGATA
		sulf1_ugi44_prm_2	CTGTTCCATGATCTTTCTCGTAATGTTATCTT
		sulf1_ugi44_pdl_2	/5Phos/ACATTATCTTGTTCATGACTTGCAGGatttaTACAATCTAACTATTATAAattaAAGATA
		sulf1_ugi44_prm_3	CTCATTGTTGGTGTAGACATTAATGTTATCTT
		sulf1_ugi44_pdl_3	/5Phos/ACATTATGTGGTTATGCACGTACTTCatttaTACAATCTAACTATTATAAattaAAGATA
		sulf1_ugi44_prm_4	CATTCTCGCCATCCAGGAGGTAATGTTATCTT
		sulf1_ugi44_pdl_4	/5Phos/ACATTAGATGTAGCTGCCATTGTATTatttaTACAATCTAACTATTATAAattaAAGATA
	Tle4 (NM_011600.3)	tle4_ugi45_prm_1	CTCACATTCCAGCTTCAGACTAATGTTATCTT
		tle4_ugi45_pdl_1	/5Phos/ACATTATGTGGTATTGAGCCTGTAAAatttaAATTTAACTATACTATATAattaAAGATA
		tle4_ugi45_prm_2	TTAACAATCTCTGCCTGCTTTAATGTTATCTT
		tle4_ugi45_pdl_2	/5Phos/ACATTAGTGCATTTCTATGTTCAACCatttaAATTTAACTATACTATATAattaAAGATA
		tle4_ugi45_prm_3	CCAATGATGGCGTTCAGTTCTAATGTTATCTT
		tle4_ugi45_pdl_3	/5Phos/ACATTATGCCATGGTCACCTGCTTGGatttaAATTTAACTATACTATATAattaAAGATA
		tle4_ugi45_prm_4	CTCCTAGTGCACTGGAGAGGTAATGTTATCTT
		tle4_ugi45_pdl_4	/5Phos/ACATTAGCCAGAAGTCCTGCACTGCTatttaAATTTAACTATACTATATAattaAAGATA
	Deptor (NM_145470.3)	deptor_ugi46_prm_1	CTAGGACTTCAGCCATGCGTTAATGTTATCTT
		deptor_ugi46_pdl_1	/5Phos/ACATTATCCAGCTCTCTCTGCTGCACatttaAACATTATACTATACTATTattaAAGATA
		deptor_ugi46_prm_2	TGAGCCAGTCAATCAGCTCTTAATGTTATCTT
		deptor_ugi46_pdl_2	/5Phos/ACATTATTTGCAACAAAGCAGTTTGGatttaAACATTATACTATACTATTattaAAGATA
		deptor_ugi46_prm_3	TGAATTCCTTGTGCTCATCATAATGTTATCTT
		deptor_ugi46_pdl_3	/5Phos/ACATTACACACGTGATGAATGATGCCatttaAACATTATACTATACTATTattaAAGATA
		deptor_ugi46_prm_4	CAGGAATTCGGATGCCATGATAATGTTATCTT
		deptor_ugi46_pdl_4	/5Phos/ACATTAAGGTCCGCTCATACTTCACCatttaAACATTATACTATACTATTattaAAGATA
	Cux1 (NM_009986.4)	cux1_ugi47_prm_1	TGCAGCTGCTGTAAATCAAATAATGTTATCTT
		cux1_ugi47_pdl_1	/5Phos/ACATTAGCGCTTCCAATATTGAAACAatttaTTATTATCTACTAAATATCattaAAGATA
		cux1_ugi47_prm_2	CCTGCTTGCGTAAATCCTCTTAATGTTATCTT
		cux1_ugi47_pdl_2	/5Phos/ACATTAGGAGTGTTCTTCTTGAATTCatttaTTATTATCTACTAAATATCattaAAGATA
		cux1_ugi47_prm_3	TCTGGTTCTCTGTTTCAATGTAATGTTATCTT
		cux1_ugi47_pdl_3	/5Phos/ACATTATCGTGTAGACGCTGCACTTTatttaTTATTATCTACTAAATATCattaAAGATA
		cux1_ugi47_prm_4	TCTCGGCCTGACTCTTCAGGTAATGTTATCTT
		cux1_ugi47_pdl_4	/5Phos/ACATTAGTCTGCTCGTATTCTCGGATatttaTTATTATCTACTAAATATCattaAAGATA
	Lratd2 (NM_001162926.1)	lratd2_ugi48_prm_1	CCTCGTCGTCATTGGAGAAATAATGTTATCTT
		lratd2_ugi48_pdl_1	/5Phos/ACATTAATATAAGAGACTCCGATGCGatttaTCTAATTAATAATCTACTAattaAAGATA
		lratd2_ugi48_prm_2	GATGCACTCATCACGATAAATAATGTTATCTT
		lratd2_ugi48_pdl_2	/5Phos/ACATTAACACCGAGCATTCCACCTCGatttaTCTAATTAATAATCTACTAattaAAGATA
		lratd2_ugi48_prm_3	TCACCTCCAGCCGGTGCAAATAATGTTATCTT
		lratd2_ugi48_pdl_3	/5Phos/ACATTATGCACCACCTGGAAATTGCCatttaTCTAATTAATAATCTACTAattaAAGATA
		lratd2_ugi48_prm_4	TTTGCCATAGCGGCACCAGGTAATGTTATCTT
		lratd2_ugi48_pdl_4	/5Phos/ACATTACCGCAAAGCTCTCGGAGTTGatttaTCTAATTAATAATCTACTAattaAAGATA
readers		ugi70 R B3I2	TTACATTACTAAATAATTC AAAgTCTAATCCgTCCCTgCCTCTATATCTCCACTC
		ugi4 R B4I2	TTAAATTTAACTACTCATA CACATTTACAgACCTCAACCTACCTCCAACTCTCAC
		ugi7 R B4I2	AATCTAACTAATAATTTCT CACATTTACAgACCTCAACCTACCTCCAACTCTCAC
		ugi12 R B4I2	TATATTCAAATTACACTAA CACATTTACAgACCTCAACCTACCTCCAACTCTCAC
		ugi13 R B2I2	CTCATATAATTTCTTATAA AGCTCAGTCCATCCTCGTAAATCCTCATCAATCATC
		ugi20 R B3I2	TAATATCTACATAATATTT AAAgTCTAATCCgTCCCTgCCTCTATATCTCCACTC
		ugi28 R B4I2	CTAATTATACCAATATAAT CACATTTACAgACCTCAACCTACCTCCAACTCTCAC
		ugi32 R B5I2	TATCTAAACTTAATATTCT CACTTCATATCACTCACTCCCAATCTCTATCTACCC
		ugi36 R B5I2	CACTTAAATATATTATAAC CACTTCATATCACTCACTCCCAATCTCTATCTACCC
		ugi61 R B2I2	TCTTATCTAATATTTACTT AGCTCAGTCCATCCTCGTAAATCCTCATCAATCATC
		ugi62 R B3I2	CTTAAATATTACTAATACA AAAgTCTAATCCgTCCCTgCCTCTATATCTCCACTC
		ugi76 R B5I2	ATATCTAACATTAAACTAT CACTTCATATCACTCACTCCCAATCTCTATCTACCC
		ugi42 R B3I2	TAAACTAATACATATTAAC AAAgTCTAATCCgTCCCTgCCTCTATATCTCCACTC
		ugi43 R B4I2	ATAACTAACAACTATTATA CACATTTACAgACCTCAACCTACCTCCAACTCTCAC
		ugi44 R B5I2	TACAATCTAACTATTATAA CACTTCATATCACTCACTCCCAATCTCTATCTACCC
		ugi45 R B2I2	AATTTAACTATACTATATA AGCTCAGTCCATCCTCGTAAATCCTCATCAATCATC
		ugi46 R B3I2	AACATTATACTATACTATT AAAgTCTAATCCgTCCCTgCCTCTATATCTCCACTC
		ugi47 R B4I2	TTATTATCTACTAAATATC CACATTTACAgACCTCAACCTACCTCCAACTCTCAC
		ugi48 R B5I2	TCTAATTAATAATCTACTA CACTTCATATCACTCACTCCCAATCTCTATCTACCC

## Sheet: Fig. 6
* The same readers used in previous figures were used.
	Gene	Probe name	Sequence (5'->3')
Fig. 6a, b	marmoset Pvalb (XM_002743736.4)	cj_pvalb_ugi31_prm_1	TTCTTGATGTCCTCAGCGTTTAATGTTATCTT
		cj_pvalb_ugi31_pdl_1	/5Phos/ACATTAGAGCAAGTCTGTCATCGACAatttaACTACAATACTAATTAATTattaAAGATA
		cj_pvalb_ugi31_prm_2	CCGACCATTTGAAAGAACTTTAATGTTATCTT
		cj_pvalb_ugi31_pdl_2	/5Phos/ACATTATTTGTGGTCGAAGGAGTCGGatttaACTACAATACTAATTAATTattaAAGATA
		cj_pvalb_ugi31_prm_3	CAGGATGTGAAACACCTTCTTAATGTTATCTT
		cj_pvalb_ugi31_pdl_3	/5Phos/ACATTATCACGTCATCTGCGCTCTTTatttaACTACAATACTAATTAATTattaAAGATA
		cj_pvalb_ugi31_prm_4	GCGTCTTAGTTTCTTTAGCATAATGTTATCTT
		cj_pvalb_ugi31_pdl_4	/5Phos/ACATTAGACAGGTCTCTGGCATCTGGatttaACTACAATACTAATTAATTattaAAGATA
	marmoset Sst (XM_002758171.4)	cj_sst_ugi32_prm_1	AGCAGCTCTGCCAAGAAGTATAATGTTATCTT
		cj_sst_ugi32_pdl_1	/5Phos/ACATTACTTAGCCAGTTCCTGCTTCCatttaTATCTAAACTTAATATTCTattaAAGATA
		cj_sst_ugi32_prm_2	ACAGATCTTCAGGTTCCAGGTAATGTTATCTT
		cj_sst_ugi32_pdl_2	/5Phos/ACATTAGCATCGTTCTCCGTCTGGTTatttaTATCTAAACTTAATATTCTattaAAGATA
		cj_sst_ugi32_prm_3	TCTGCAGCTCAAGCCTCATTTAATGTTATCTT
		cj_sst_ugi32_pdl_3	/5Phos/ACATTATCATCCTGCTCAGCAGCCTGatttaTATCTAAACTTAATATTCTattaAAGATA
		cj_sst_ugi32_prm_4	AGCCAGCTTTGCGTTCTCGGTAATGTTATCTT
		cj_sst_ugi32_pdl_4	/5Phos/ACATTAGGTGCCATAGCTGAGTTTGAatttaTATCTAAACTTAATATTCTattaAAGATA
	marmoset Vip (XM_002747118.4)	cj_vip_ugi33_prm_1	AGGCCATGCTGACGTCTGTGTAATGTTATCTT
		cj_vip_ugi33_pdl_1	/5Phos/ACATTAAGAAGAGCACACTCAGAAGGatttaTAATCAAATTTACATATATattaAAGATA
		cj_vip_ugi33_prm_2	TGCCTGGCATTTCTGGATACTAATGTTATCTT
		cj_vip_ugi33_pdl_2	/5Phos/ACATTAGTCATAATAAGGTGTGTCGTatttaTAATCAAATTTACATATATattaAAGATA
		cj_vip_ugi33_prm_3	GTTACTGCTAACACGCTTTCTAATGTTATCTT
		cj_vip_ugi33_pdl_3	/5Phos/ACATTACCATAAGAGACTCAAGATACatttaTAATCAAATTTACATATATattaAAGATA
		cj_vip_ugi33_prm_4	CTGTGAAGACTGCGTCTGAGTAATGTTATCTT
		cj_vip_ugi33_pdl_4	/5Phos/ACATTATGACGTTTGACTGGTACAGGatttaTAATCAAATTTACATATATattaAAGATA
	rhesus macaque Pvalb (XM_015150253.2)	mmul_pvalb_ugi31_prm_1	TTCTTGATGTCCTCAGCGTTTAATGTTATCTT
		mmul_pvalb_ugi31_pdl_1	/5Phos/ACATTAGAGCAAGTCTGTCATCGACAatttaACTACAATACTAATTAATTattaAAGATA
		mmul_pvalb_ugi31_prm_2	CGACCATTTGGAAGAACTTTTAATGTTATCTT
		mmul_pvalb_ugi31_pdl_2	/5Phos/ACATTATTGTGGTCGAAGGAGTCAATatttaACTACAATACTAATTAATTattaAAGATA
		mmul_pvalb_ugi31_prm_3	CAGGATATGAAACACCTTCTTAATGTTATCTT
		mmul_pvalb_ugi31_pdl_3	/5Phos/ACATTATCACATCATCCGCACTCTTTatttaACTACAATACTAATTAATTattaAAGATA
		mmul_pvalb_ugi31_prm_4	GCGTCTTGGTTTCTTTAGCATAATGTTATCTT
		mmul_pvalb_ugi31_pdl_4	/5Phos/ACATTAGACAGGTCTCTGGCATCTGGatttaACTACAATACTAATTAATTattaAAGATA
	rhesus macaque Sst (NM_001194239.1)	mmul_sst_ugi32_prm_1	AGCAGCTCTGCCAAGAAGTATAATGTTATCTT
		mmul_sst_ugi32_pdl_1	/5Phos/ACATTACTTGGCTAGTTCCTGCTTCCatttaTATCTAAACTTAATATTCTattaAAGATA
		mmul_sst_ugi32_prm_2	TCTGCAACTCAAGCCTCATTTAATGTTATCTT
		mmul_sst_ugi32_pdl_2	/5Phos/ACATTATCATCCTGCTCAGCAGCCTGatttaTATCTAAACTTAATATTCTattaAAGATA
		mmul_sst_ugi32_prm_3	CTTCCAGAAGAAATTCTTGCTAATGTTATCTT
		mmul_sst_ugi32_pdl_3	/5Phos/ACATTAAGCCAGCTTTGCGTTCTCGGatttaTATCTAAACTTAATATTCTattaAAGATA
	rhesus macaque Vip (NM_001260752.1)	mmul_vip_ugi33_prm_1	GTCAGAAGCACAAGGAGCTGTAATGTTATCTT
		mmul_vip_ugi33_pdl_1	/5Phos/ACATTAGGCCTTATTTCTGGTGTCCAatttaTAATCAAATTTACATATATattaAAGATA
		mmul_vip_ugi33_prm_2	AAGAGGCCATGCCGACGTCTTAATGTTATCTT
		mmul_vip_ugi33_pdl_2	/5Phos/ACATTAGTGAGAACAGCACACTGAGAatttaTAATCAAATTTACATATATattaAAGATA
		mmul_vip_ugi33_prm_3	TACTGAAGTCACTGGTGAAATAATGTTATCTT
		mmul_vip_ugi33_pdl_3	/5Phos/ACATTAACTCCATCAGCATGCCTGGCatttaTAATCAAATTTACATATATattaAAGATA
		mmul_vip_ugi33_prm_4	TGACGTTTGACTGGCACAGGTAATGTTATCTT
		mmul_vip_ugi33_pdl_4	/5Phos/ACATTAGTCTTCTGAGATGTTGCTGCatttaTAATCAAATTTACATATATattaAAGATA
	human FXN for viral transcript	cFXN_ugi41_prm_1	CAAATCTGGTTGAGGCCACGTAATGTTATCTT
		cFXN_ugi41_pdl_1	/5Phos/ACATTATTGGTTCGAACTTGCGCGGCatttaATTCTATTAACCTATATATattaAAGATA
		cFXN_ugi41_prm_2	CTGCTAGTCTTTCATAGGTGTAATGTTATCTT
		cFXN_ugi41_pdl_2	/5Phos/ACATTAGTCTCATCTAGAGAGCCTGGatttaATTCTATTAACCTATATATattaAAGATA
		cFXN_ugi41_prm_3	TTGTCTGCAAGGTCTTCAAATAATGTTATCTT
		cFXN_ugi41_pdl_3	/5Phos/ACATTAAAACTCTGCTAAAGAGTCCAatttaATTCTATTAACCTATATATattaAAGATA
		cFXN_ugi41_prm_4	GACAGTTAAGACACCACTCCTAATGTTATCTT
		cFXN_ugi41_pdl_4	/5Phos/ACATTACAAAGGAGACATCATAGTCCatttaATTCTATTAACCTATATATattaAAGATA
Fig. 6d	rhesus macaque Lamp5 (NM_001194698.2)	mmul_lamp5_ugi34_prm_1	TCGAAGTCTGTCGACGCTGGTAATGTTATCTT
		mmul_lamp5_ugi34_pdl_1	/5Phos/ACATTAGGACCGCTCTTCCTTGGAGAatttaTATATATAAATTCATCTTAattaAAGATA
		mmul_lamp5_ugi34_prm_2	GGTACAATAAATTTGGCTGCTAATGTTATCTT
		mmul_lamp5_ugi34_pdl_2	/5Phos/ACATTAAAACTCTGCCATGAGACACGatttaTATATATAAATTCATCTTAattaAAGATA
		mmul_lamp5_ugi34_prm_3	GTAGACAAACTGCACTTTGCTAATGTTATCTT
		mmul_lamp5_ugi34_pdl_3	/5Phos/ACATTATCAGCCTCCAAGTCGCCTCAatttaTATATATAAATTCATCTTAattaAAGATA
		mmul_lamp5_ugi34_prm_4	AGTGAAATGGTTTGTTGAGCTAATGTTATCTT
		mmul_lamp5_ugi34_pdl_4	/5Phos/ACATTATTGACACTCATAGGACTTCCatttaTATATATAAATTCATCTTAattaAAGATA
	rhesus macaque Slc17a7 (XM_015124574.2)	mmul_slc17a7_ugi35_prm_1	CCAAAGCTGATACAGAAGCCTAATGTTATCTT
		mmul_slc17a7_ugi35_pdl_1	/5Phos/ACATTACAGACCACTCATGATGGCGAatttaTTACTATCTCAATAAATATattaAAGATA
		mmul_slc17a7_ugi35_prm_2	CATGTTTAGAGTGGATGTTGTAATGTTATCTT
		mmul_slc17a7_ugi35_pdl_2	/5Phos/ACATTACCACAATAGCAAAGCCGAAAatttaTTACTATCTCAATAAATATattaAAGATA
		mmul_slc17a7_ugi35_prm_3	AGCTGCCGTAGACGTAGAAATAATGTTATCTT
		mmul_slc17a7_ugi35_pdl_3	/5Phos/ACATTAACAGAGCTCCATCCTGAGTAatttaTTACTATCTCAATAAATATattaAAGATA
		mmul_slc17a7_ugi35_prm_4	CGATGGCGTCCTCGATGTACTAATGTTATCTT
		mmul_slc17a7_ugi35_pdl_4	/5Phos/ACATTATTGCGCTCCTCCTCCGAGATatttaTTACTATCTCAATAAATATattaAAGATA
	rhesus macaque Crym (NM_001266891.1)	mmul_crym_ugi37_prm_1	TGACCAACTTGGTGGTCAGGTAATGTTATCTT
		mmul_crym_ugi37_pdl_1	/5Phos/ACATTAGCATCCTCTGCAGCACTGTAatttaAATTATAATAATCTAACTCattaAAGATA
		mmul_crym_ugi37_prm_2	GTTCTCTTTGCAGTTATGACTAATGTTATCTT
		mmul_crym_ugi37_pdl_2	/5Phos/ACATTAATTTCCATCCATGACCGCCAatttaAATTATAATAATCTAACTCattaAAGATA
		mmul_crym_ugi37_prm_3	ACTGCTCTGTGAAGATCTCATAATGTTATCTT
		mmul_crym_ugi37_pdl_3	/5Phos/ACATTATAGTGGCTGTAGGCCTGGACatttaAATTATAATAATCTAACTCattaAAGATA
		mmul_crym_ugi37_prm_4	TCACATCTGCACCTGCCACATAATGTTATCTT
		mmul_crym_ugi37_pdl_4	/5Phos/ACATTAGCCTCCTGGACCGAAGAACAatttaAATTATAATAATCTAACTCattaAAGATA
	rhesus macaque Nr4a2 (NM_001266910.2)	mmul_nr4a2_ugi38_prm_1	AAATCGGAGCTGTATTCTCCTAATGTTATCTT
		mmul_nr4a2_ugi38_pdl_1	/5Phos/ACATTACGAAGAGTGGTAACTGTAGCatttaTTATTAACATTAATTACACattaAAGATA
		mmul_nr4a2_ugi38_prm_2	CAAGCAAGGTGGCTTGACGTTAATGTTATCTT
		mmul_nr4a2_ugi38_pdl_2	/5Phos/ACATTACGTAGCCTGTGCTGTAGTTGatttaTTATTAACATTAATTACACattaAAGATA
		mmul_nr4a2_ugi38_prm_3	GTAAACCGAACCGGAGTGCGTAATGTTATCTT
		mmul_nr4a2_ugi38_pdl_3	/5Phos/ACATTAGCATCATCTCCTCAGACTGGatttaTTATTAACATTAATTACACattaAAGATA
		mmul_nr4a2_ugi38_prm_4	GTAGTGGCCACGTAGTTCTGTAATGTTATCTT
		mmul_nr4a2_ugi38_pdl_4	/5Phos/ACATTAGTGGAAGTTGTGGAGAGACCatttaTTATTAACATTAATTACACattaAAGATA

## Sheet: Extended Data. Fig. 4
Dose (vg)	Probe name	Sequence (5'->3')
100000000000	BC2-ugi2_primer-1	CATACCCACTATACCACCTA TAATGTTATCTT
	BC2-ugi2_padlock-1	/5Phos/ACATTA TCTACCCTACTACCTAACTC ATTTA ATATAATACTACTATAATC ATTA AAGATA
	BC2-ugi2_primer-2	CCATCTACATAACCTACCCA TAATGTTATCTT
	BC2-ugi2_padlock-2	/5Phos/ACATTA TTCTACCTATACTCCCACCT ATTTA ATATAATACTACTATAATC ATTA AAGATA
	BC2-ugi2_primer-3	CCCACCCTAATCCAATACTA TAATGTTATCTT
	BC2-ugi2_padlock-3	/5Phos/ACATTA TCTCACATACCTAAACACCC ATTTA ATATAATACTACTATAATC ATTA AAGATA
	BC2-ugi2_primer-4	CCTACCCTACTACTAACACC TAATGTTATCTT
	BC2-ugi2_padlock-4	/5Phos/ACATTA CCTCCTATCTAACCCTCACA ATTTA ATATAATACTACTATAATC ATTA AAGATA
10000000000	BC3-ugi3_primer-1	CCCACCAATTAACCTCCACA TAATGTTATCTT
	BC3-ugi3_padlock-1	/5Phos/ACATTA CACCCTTACCTATACTCTCT ATTTA TTAATATACTAACTAACTA ATTA AAGATA
	BC3-ugi3_primer-2	CCTACCCTACTAACCTCCCA TAATGTTATCTT
	BC3-ugi3_padlock-2	/5Phos/ACATTA TACCCACACTACTAACCCTA ATTTA TTAATATACTAACTAACTA ATTA AAGATA
	BC3-ugi3_primer-3	TAACCCTACTCAATCTACCC TAATGTTATCTT
	BC3-ugi3_padlock-3	/5Phos/ACATTA ACACCACCTAATACCTACCT ATTTA TTAATATACTAACTAACTA ATTA AAGATA
	BC3-ugi3_primer-4	TTCCCAACCTATCATACTCC TAATGTTATCTT
	BC3-ugi3_padlock-4	/5Phos/ACATTA CCTAACCACTACTCATACAC ATTTA TTAATATACTAACTAACTA ATTA AAGATA
1000000000	BC4-ugi4_primer-1	CCAATTCACCTATCCTCACC TAATGTTATCTT
	BC4-ugi4_padlock-1	/5Phos/ACATTA ACCCACTACTAATCCTTCCC ATTTA TTAAATTTAACTACTCATA ATTA AAGATA
	BC4-ugi4_primer-2	TCTCCTCCTATACTACCCAC TAATGTTATCTT
	BC4-ugi4_padlock-2	/5Phos/ACATTA CACCCTCTCTCTCTCTTACT ATTTA TTAAATTTAACTACTCATA ATTA AAGATA
	BC4-ugi4_primer-3	CCCTCACCTTATTACCCTCA TAATGTTATCTT
	BC4-ugi4_padlock-3	/5Phos/ACATTA ACCCACTCTAACTAACACCC ATTTA TTAAATTTAACTACTCATA ATTA AAGATA
	BC4-ugi4_primer-4	CCCTCCAACTATCCTACCAA TAATGTTATCTT
	BC4-ugi4_padlock-4	/5Phos/ACATTA CCCTAACCACCCTAATCCTT ATTTA TTAAATTTAACTACTCATA ATTA AAGATA
100000000	BC9-ugi9_primer-1	ACTCACCCTAATCTCCCTAC TAATGTTATCTT
	BC9-ugi9_padlock-1	/5Phos/ACATTA CCCTTAACACCCTACCATAA ATTTA TATATTCATTAACAATTAA ATTA AAGATA
	BC9-ugi9_primer-2	ACCTCTCCTCTCTCCTCTCA TAATGTTATCTT
	BC9-ugi9_padlock-2	/5Phos/ACATTA CTACCTACTCATAACCCTCT ATTTA TATATTCATTAACAATTAA ATTA AAGATA
	BC9-ugi9_primer-3	CACTACTATCCCTACATCAC TAATGTTATCTT
	BC9-ugi9_padlock-3	/5Phos/ACATTA CCCACAATACTCCCTAATCC ATTTA TATATTCATTAACAATTAA ATTA AAGATA
	BC9-ugi9_primer-4	CACCACACCACACACACCAA TAATGTTATCTT
	BC9-ugi9_padlock-4	/5Phos/ACATTA CTCCCTAACCTATCCTCCTA ATTTA TATATTCATTAACAATTAA ATTA AAGATA
10000000	BC1-ugi1_primer-1	CAACTACCTATACCTCCCAT TAATGTTATCTT
	BC1-ugi1_padlock-1	/5Phos/ACATTA CCATACCTTACCACCTATCT ATTTA TATTATTATATTTACCCTA ATTA AAGATA
	BC1-ugi1_primer-2	CCACTCAACTAAACCTACCT TAATGTTATCTT
	BC1-ugi1_padlock-2	/5Phos/ACATTA TCCCAACTAACCTACCATTC ATTTA TATTATTATATTTACCCTA ATTA AAGATA
	BC1-ugi1_primer-3	ACCCAATCCACCTATATTCC TAATGTTATCTT
	BC1-ugi1_padlock-3	/5Phos/ACATTA TACCTTACAACTATCCCTCC ATTTA TATTATTATATTTACCCTA ATTA AAGATA
	BC1-ugi1_primer-4	CCTAACCCTACTAATTCTCC TAATGTTATCTT
	BC1-ugi1_padlock-4	/5Phos/ACATTA TTCCTAACATACCCTCAACC ATTTA TATTATTATATTTACCCTA ATTA AAGATA
readers	ugi1 R B2I2	TATTATTATATTTACCCTA AGCTCAGTCCATCCTCGTAAATCCTCATCAATCATC
	ugi2 R B3I2	ATATAATACTACTATAATC AAAgTCTAATCCgTCCCTgCCTCTATATCTCCACTC
	ugi3 R B4I2	TTAATATACTAACTAACTA CACATTTACAgACCTCAACCTACCTCCAACTCTCAC
	ugi4 R B5I2	TTAAATTTAACTACTCATA CACTTCATATCACTCACTCCCAATCTCTATCTACCC
	ugi9 R B2I2	TATATTCATTAACAATTAA AGCTCAGTCCATCCTCGTAAATCCTCATCAATCATC

## Sheet: Supplementary Fig. 1
	Gene	Probe name	Sequence (5'->3')
Supplementary Fig. 1d	Pgk1 (NM_008828.3)	1	ACCCTCATCACGACCCGCTT aaaa CACATTTACAgACCTCAACCTACCTCCAACTCTCAC
		2	AGGTGGCTCATAAGGACAAC aaaa CACATTTACAgACCTCAACCTACCTCCAACTCTCAC
		3	TCCTCTACATGAAAGCGGAG aaaa CACATTTACAgACCTCAACCTACCTCCAACTCTCAC
		4	CCATGTTGTTGAGCACCTTA aaaa CACATTTACAgACCTCAACCTACCTCCAACTCTCAC
		5	TTGACAATCTTGGCTCCTTC aaaa CACATTTACAgACCTCAACCTACCTCCAACTCTCAC
		6	CAATCTGCTTAGCTCGACCC aaaa CACATTTACAgACCTCAACCTACCTCCAACTCTCAC
		7	CCACCACCTATGATAGTGAT aaaa CACATTTACAgACCTCAACCTACCTCCAACTCTCAC
		8	GGCTGACTTTATCCTCTGTG aaaa CACATTTACAgACCTCAACCTACCTCCAACTCTCAC

## Sheet: others
Toehold hairpins	B2H1T-10nt	GGCGGTTTACTGGATGATTGATGAGGATTTACGAGGAGCTCAGTCCATCCTCGTAAATCCTCATCAATCATC GATTAGGGTG
	B3H1T-10nt	CgggTTAAAgTT gAgTggAgATATAgAggCAgggAC AAAgTCTAATCCgTCCCTgCCTCTATATCTCCACTC AATTGGAGAG
	B4H1T-10nt	GAAGCGAATATGGTGAGAGTTGGAGGTAGGTTGAGGCACATTTACAGACCTCAACCTACCTCCAACTCTCAC GAAGGGTTAG
	B5H1T-10nt	ATTggATTTgTAgggTAgATAgAgATTgggAgTgAg CACTTCATATCACTCACTCCCAATCTCTATCTACCC TGATGAGTGG
Displacement oligos	B2Dis-10nt	CACCCTAATC GATGATTGATGAGGATTTACGAGGATGGACTGAGCT
	B3Dis-10nt	CTCTCCAATT gAgTggAgATATAgAggCAgggAC ggATTAgACTTT
	B4Dis-10nt	CTAACCCTTC GTGAGAGTTGGAGGTAGGTTGAGGTCTGTAAATGTG
	B5Dis-10nt	CCACTCATCA GGGTAGATAGAGATTGGGAGTGAGTGATATGAAGTG
